# Supplementary material for: Robust Prediction of Expression Differences among Human Individuals Using Only Genotype Information
Source: PubMed Central journal article supplement (PMC3610805; doi:10.1371/journal.pgen.1003396), 2013-03-28

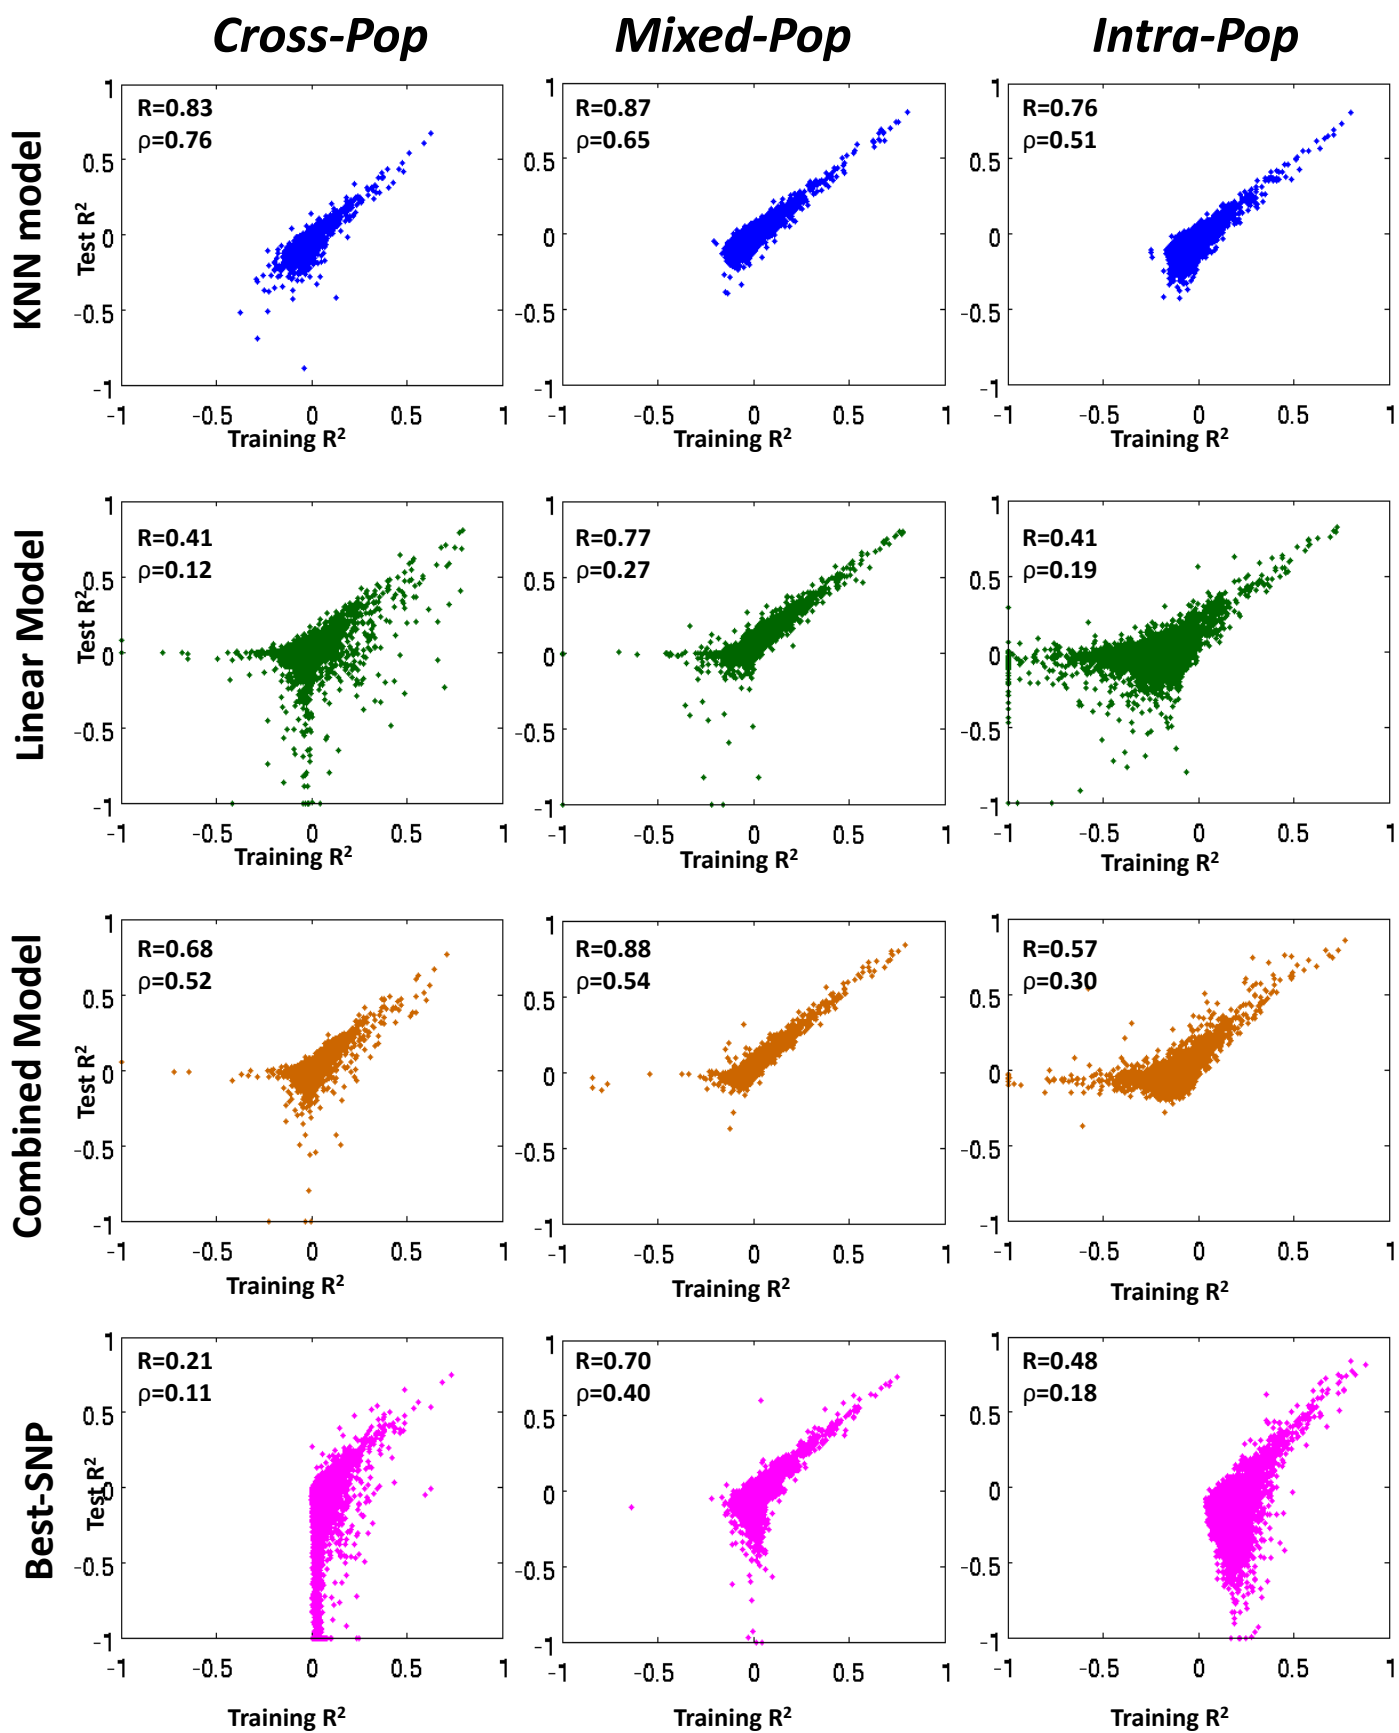

Supplement: pgen.1003396.s001.pdf [file pgen.1003396.s001.pdf]
