# Supplementary material for: Robust Prediction of Expression Differences among Human Individuals Using Only Genotype Information
Source: PubMed Central journal article supplement (PMC3610805; doi:10.1371/journal.pgen.1003396), 2013-03-28

Cross-Pop  $P < 10^{-112}$

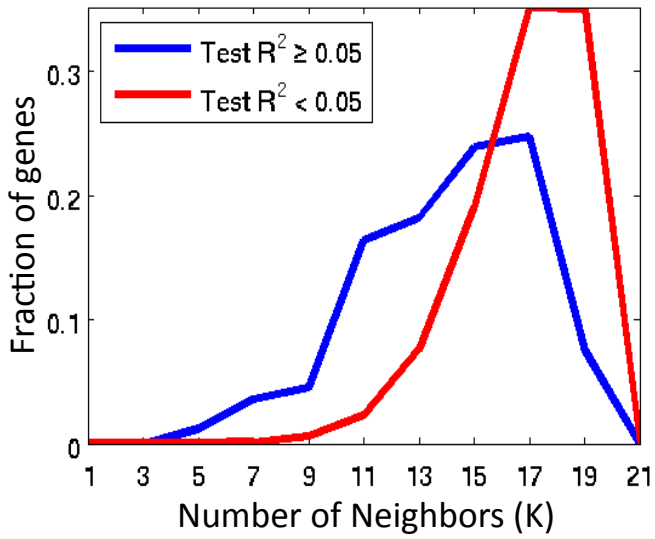

Mixed-Pop  $P < 10^{-200}$

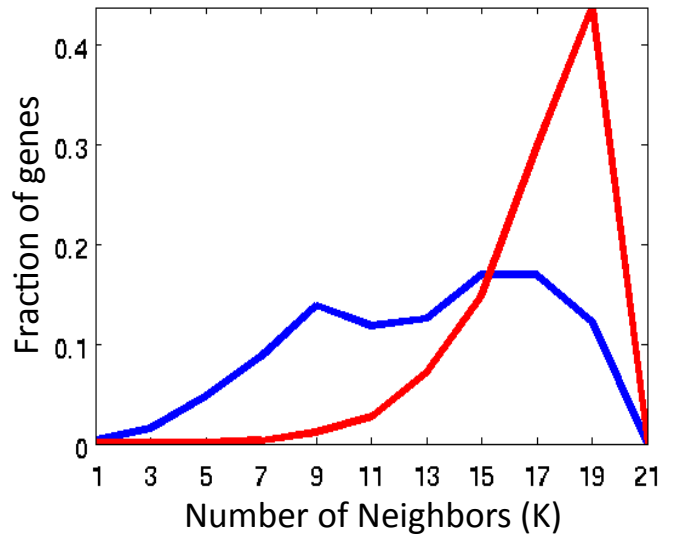

Intra-Pop (CHB)  $P < 10^{-259}$

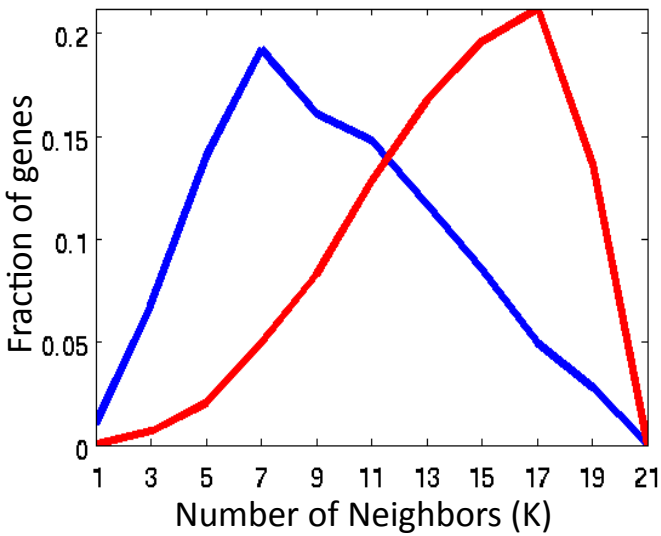

Intra-Pop (JPT)  $P < 10^{-274}$

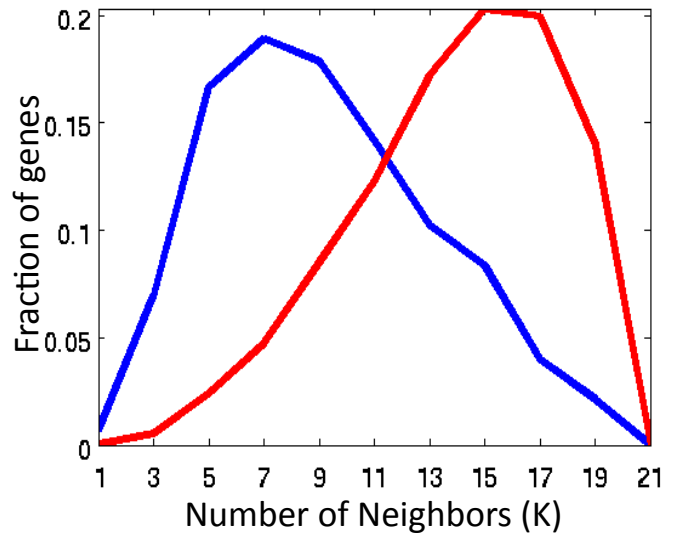

Intra-Pop (YRI)  $P < 10^{-225}$

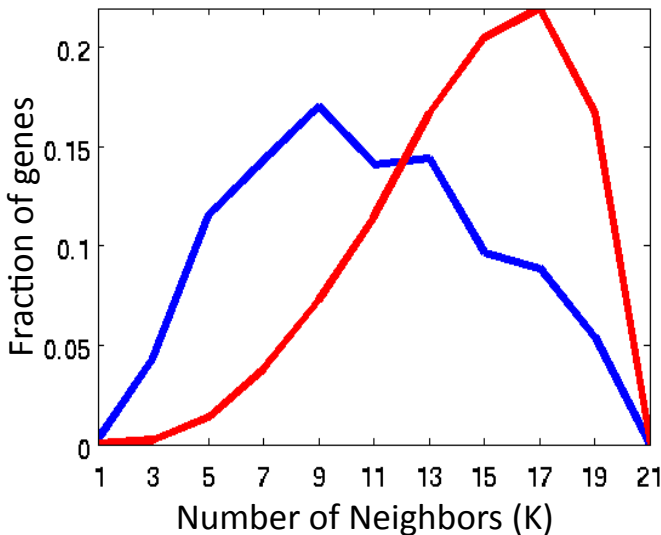

Intra-Pop (CEU)  $P < 10^{-274}$

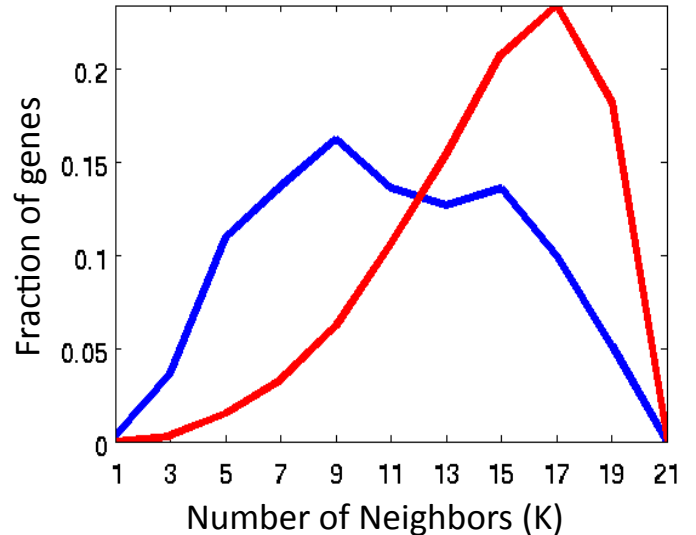

Supplement: pgen.1003396.s004.pdf [file pgen.1003396.s004.pdf]
