# Supplementary material for: Robust Prediction of Expression Differences among Human Individuals Using Only Genotype Information
Source: PubMed Central journal article supplement (PMC3610805; doi:10.1371/journal.pgen.1003396), 2013-03-28
Supplement: pgen.1003396.s005.pdf [file pgen.1003396.s005.pdf]

**Table S1. Number of genes that pass a certain R<sup>2</sup> threshold in test/training using the different models in the Mixed-Pop cross-validation scheme**

| <b>R<sup>2</sup> threshold</b> | <b>KNN</b> | <b>Elastic-Net</b> | <b>Combined</b> | <b>Single SNP</b> | <b>All models</b> |
|--------------------------------|------------|--------------------|-----------------|-------------------|-------------------|
| 0.05                           | 503/627    | 559/567            | 555/558         | 829/1355          | 956/1419          |
| 0.1                            | 278/340    | 356/359            | 338/341         | 448/575           | 529/624           |
| 0.2                            | 103/129    | 171/173            | 149/151         | 172/199           | 214/234           |
| 0.3                            | 56/62      | 85/86              | 69/69           | 81/86             | 103/109           |
| 0.4                            | 28/32      | 49/50              | 38/38           | 43/46             | 57/61             |
| 0.5                            | 18/18      | 26/28              | 19/19           | 17/19             | 30/32             |
