# Supplementary material for: Robust Prediction of Expression Differences among Human Individuals Using Only Genotype Information
Source: PubMed Central journal article supplement (PMC3610805; doi:10.1371/journal.pgen.1003396), 2013-03-28
Supplement: pgen.1003396.s006.pdf [file pgen.1003396.s006.pdf]

**Table S2. Number of genes that pass a certain R<sup>2</sup> threshold in test/training using the different models in the Intra-Pop cross-validation scheme**

| <b>R<sup>2</sup> threshold</b> | <b>KNN</b> | <b>Elastic-Net</b> | <b>Combined</b> | <b>Single SNP</b> | <b>All models</b> |
|--------------------------------|------------|--------------------|-----------------|-------------------|-------------------|
| 0.05                           | 320/488    | 160/161            | 226/227         | 524/15346         | 586/15348         |
| 0.1                            | 190/283    | 105/106            | 143/143         | 382/14754         | 411/14756         |
| 0.2                            | 76/101     | 59/59              | 70/70           | 203/2851          | 208/2852          |
| 0.3                            | 37/46      | 39/39              | 40/40           | 118/472           | 119/473           |
| 0.4                            | 19/24      | 22/22              | 19/19           | 65/150            | 67/150            |
| 0.5                            | 12/14      | 11/11              | 9/9             | 34/67             | 40/68             |
