# Supplementary material for: Robust Prediction of Expression Differences among Human Individuals Using Only Genotype Information
Source: PubMed Central journal article supplement (PMC3610805; doi:10.1371/journal.pgen.1003396), 2013-03-28
Supplement: pgen.1003396.s007.pdf [file pgen.1003396.s007.pdf]

**Table S3. Number of top predicted genes that overlap between different models at different cutoffs in the Mixed-Pop cross-validation scheme. KNN, K-Nearest-Neighbor; EN, Elastic-Net; SS, Single-SNP.**

| <b>Top genes</b> | <b>KNN-EN</b> | <b>KNN-SS</b> | <b>EN-SS</b> | <b>All models</b> |
|------------------|---------------|---------------|--------------|-------------------|
| 10               | 7             | 5             | 6            | 4                 |
| 20               | 14            | 11            | 12           | 9                 |
| 50               | 36            | 30            | 37           | 26                |
| 100              | 74            | 64            | 72           | 58                |
| 200              | 143           | 131           | 149          | 117               |
