# Supplementary material for: Robust Prediction of Expression Differences among Human Individuals Using Only Genotype Information
Source: PubMed Central journal article supplement (PMC3610805; doi:10.1371/journal.pgen.1003396), 2013-03-28
Supplement: pgen.1003396.s008.pdf [file pgen.1003396.s008.pdf]

**Table S4. Number of top predicted genes that overlap between different models at different cutoffs in the Intra-Pop cross-validation scheme. KNN, K-Nearest-Neighbor; EN, Elastic-Net; SS, Single-SNP.**

| <b># Top genes</b> | <b>KNN-EN</b> | <b>KNN-SS</b> | <b>EN-SS</b> | <b>All models</b> |
|--------------------|---------------|---------------|--------------|-------------------|
| 10                 | 7             | 4             | 5            | 4                 |
| 20                 | 11            | 12            | 13           | 9                 |
| 50                 | 35            | 35            | 41           | 31                |
| 100                | 73            | 65            | 76           | 60                |
| 200                | 130           | 125           | 155          | 109               |
