# Supplementary material for: Robust Prediction of Expression Differences among Human Individuals Using Only Genotype Information
Source: PubMed Central journal article supplement (PMC3610805; doi:10.1371/journal.pgen.1003396), 2013-03-28
Supplement: pgen.1003396.s009.pdf [file pgen.1003396.s009.pdf]

**Table S5. The list of the 100 top-predicted genes of the KNN model in the Cross-Pop cross-validation scheme**

| Entrez ID | Mean Test R <sup>2</sup> | Gene Symbol   | Gene Description                                                      |
|-----------|--------------------------|---------------|-----------------------------------------------------------------------|
| 91612     | 0.67                     | My015         | churchill domain containing 1                                         |
| 158160    | 0.56                     | MGC88684      | hydroxysteroid (17-beta) dehydrogenase 7 pseudogene 2                 |
| 84288     | 0.55                     | RP11-290P14.1 | EF-hand calcium binding domain 2                                      |
| 93035     | 0.51                     | PKHDL1        | polycystic kidney and hepatic disease 1 (autosomal recessive)-like 1  |
| 94101     | 0.45                     | ORMDL1        | ORM1-like 1 ( <i>S. cerevisiae</i> )                                  |
| 6231      | 0.44                     | RPS26         | ribosomal protein S26                                                 |
| 829       | 0.41                     | CAZ1          | capping protein (actin filament) muscle Z-line, alpha 1               |
| 3117      | 0.41                     | HLA-DQA       | major histocompatibility complex, class II, DQ alpha 1                |
| 3663      | 0.39                     | IRF5          | interferon regulatory factor 5                                        |
| 91687     | 0.38                     | RP3-383J4.1   | centromere protein L                                                  |
| 3127      | 0.38                     | HLA-DRB5      | major histocompatibility complex, class II, DR beta 5                 |
| 3123      | 0.37                     | HLA-DRB1      | major histocompatibility complex, class II, DR beta 1                 |
| 55556     | 0.33                     | TYMSAS        | enolase superfamily member 1                                          |
| 9045      | 0.33                     | RPL14         | ribosomal protein L14                                                 |
| 8904      | 0.32                     | MGC1142       | copine 1                                                              |
| 84833     | 0.31                     | USMG5         | upregulated during skeletal muscle growth 5 homolog (mouse)           |
| 81889     | 0.31                     | YISKL         | fumarylacetoacetate hydrolase domain containing 1                     |
| 2635      | 0.31                     | GBP3          | guanylate binding protein 3                                           |
| 115024    | 0.29                     | NT5C3L        | 5'-nucleotidase, cytosolic III-like                                   |
| 55228     | 0.29                     | FLJ10781      | hypothetical protein FLJ10781                                         |
| 858       | 0.29                     | MGC12294      | caveolin 2                                                            |
| 10494     | 0.28                     | YSK1          | serine/threonine kinase 25 (STE20 homolog, yeast)                     |
| 282991    | 0.28                     | RP11-316M21.4 | biogenesis of lysosome-related organelles complex-1, subunit 2        |
| 11118     | 0.27                     | BTN3A2        | butyrophilin, subfamily 3, member A2                                  |
| 162394    | 0.26                     | SLFN5         | schlafen family member 5                                              |
| 3652      | 0.25                     | IPP           | intracisternal A particle-promoted polypeptide                        |
| 87769     | 0.25                     | RP11-151A6.2  | hypothetical protein BC004360                                         |
| 54535     | 0.25                     | SBP           | coiled-coil alpha-helical rod protein 1                               |
| 7639      | 0.25                     | ZNF85         | zinc finger protein 85                                                |
| 84617     | 0.25                     | TUBB6         | tubulin, beta 6                                                       |
| 255403    | 0.24                     | ZNF718        | zinc finger protein 718                                               |
| 128272    | 0.24                     | WGEF          | Rho guanine nucleotide exchange factor (GEF) 19                       |
| 7536      | 0.23                     | ZNF162        | splicing factor 1                                                     |
| 133383    | 0.23                     | MGC33648      | hypothetical protein MGC33648                                         |
| 54014     | 0.23                     | WDR9          | bromodomain and WD repeat domain containing 1                         |
| 80817     | 0.22                     | PS1TP3        | KIAA1712                                                              |
| 23593     | 0.22                     | SOUL          | heme binding protein 2                                                |
| 219927    | 0.22                     | MRPL21        | mitochondrial ribosomal protein L21                                   |
| 80008     | 0.22                     | TMEM156       | transmembrane protein 156                                             |
| 51144     | 0.21                     | KAR           | hydroxysteroid (17-beta) dehydrogenase 12                             |
| 113277    | 0.21                     | TMEM106A      | transmembrane protein 106A                                            |
| 5411      | 0.21                     | SDK3          | pinin, desmosome associated protein                                   |
| 26519     | 0.21                     | TIMM10        | translocase of inner mitochondrial membrane 10 homolog (yeast)        |
| 3059      | 0.20                     | HS1           | hematopoietic cell-specific Lyn substrate 1                           |
| 152815    | 0.20                     | THAP6         | THAP domain containing 6                                              |
| 6168      | 0.20                     | RPL37A        | ribosomal protein L37a                                                |
| 25961     | 0.20                     | NUDT13        | nudix (nucleoside diphosphate linked moiety X)-type motif 13          |
| 84314     | 0.20                     | TMEM107       | transmembrane protein 107                                             |
| 84680     | 0.20                     | PHACS         | 1-aminocyclopropane-1-carboxylate synthase                            |
| 7311      | 0.20                     | UBA52         | ubiquitin A-52 residue ribosomal protein fusion product 1             |
| 10953     | 0.20                     | TOMM34        | translocase of outer mitochondrial membrane 34                        |
| 29035     | 0.20                     | PRO0149       | PRO0149 protein                                                       |
| 197322    | 0.19                     | LOC197322     | hypothetical protein LOC197322                                        |
| 23008     | 0.19                     | KIAA0265      | KIAA0265 protein                                                      |
| 130502    | 0.19                     | LOC130502     | similar to CG14894-PA                                                 |
| 7390      | 0.19                     | UROS          | uroporphyrinogen III synthase (congenital erythropoietic porphyria)   |
| 84516     | 0.19                     | p25           | dynactin 5 (p25)                                                      |
| 10694     | 0.19                     | KIAA0002      | chaperonin containing TCP1, subunit 8 (theta)                         |
| 2768      | 0.19                     | RMP           | guanine nucleotide binding protein (G protein) alpha 12               |
| 27102     | 0.19                     | KIAA1369      | eukaryotic translation initiation factor 2-alpha kinase 1             |
| 9179      | 0.19                     | MU-ARP2       | adaptor-related protein complex 4, mu 1 subunit                       |
| 7760      | 0.18                     | ZNF213        | zinc finger protein 213                                               |
| 348094    | 0.18                     | MGC120307     | ankyrin repeat and death domain containing 1A                         |
| 283726    | 0.18                     | DKFZp666G057  | hypothetical protein DKFZp666G057                                     |
| 261726    | 0.17                     | TIPRL         | TIP41, TOR signalling pathway regulator-like ( <i>S. cerevisiae</i> ) |
| 57602     | 0.17                     | USP36         | ubiquitin specific peptidase 36                                       |

|        |      |              |                                                                                                |
|--------|------|--------------|------------------------------------------------------------------------------------------------|
| 3105   | 0.17 | HLA-A        | major histocompatibility complex, class I, A                                                   |
| 9794   | 0.17 | MAML1        | mastermind-like 1 (Drosophila)                                                                 |
| 10412  | 0.17 | YR-29        | TGF beta-inducible nuclear protein 1                                                           |
| 387338 | 0.17 | RP4-603I14.2 | NOL1/NOP2/Sun domain family, member 4                                                          |
| 1965   | 0.16 | EIF2S1       | eukaryotic translation initiation factor 2, subunit 1 alpha, 35kDa                             |
| 51275  | 0.16 | FLJ39616     | chromosome 12 open reading frame 47                                                            |
| 1912   | 0.16 | PHC2         | polyhomeotic-like 2 (Drosophila)                                                               |
| 4552   | 0.16 | MTRR         | 5-methyltetrahydrofolate-homocysteine methyltransferase reductase                              |
| 51101  | 0.16 | CGI-62       | chromosome 8 open reading frame 70                                                             |
| 10233  | 0.16 | LRRC23       | leucine rich repeat containing 23                                                              |
| 5037   | 0.16 | RKIP         | phosphatidylethanolamine binding protein 1                                                     |
| 55755  | 0.16 | MCPH3        | CDK5 regulatory subunit associated protein 2                                                   |
| 1520   | 0.16 | MGC3886      | cathepsin S                                                                                    |
| 8034   | 0.15 | SLC25A16     | solute carrier family 25 (mitochondrial carrier; Graves disease autoantigen), member 16        |
| 7084   | 0.15 | TK2          | thymidine kinase 2, mitochondrial                                                              |
| 10645  | 0.15 | MGC15254     | calcium/calmodulin-dependent protein kinase kinase 2, beta                                     |
| 3134   | 0.15 | HLAF         | major histocompatibility complex, class I, F                                                   |
| 8693   | 0.15 | GALNT4       | UDP-N-acetyl-alpha-D-galactosamine:polypeptide N-acetylgalactosaminyltransferase 4 (GalNAc-T4) |
| 23042  | 0.15 | LP8165       | KIAA0251 protein                                                                               |
| 10520  | 0.15 | ZNFC25       | zinc finger protein 211                                                                        |
| 2653   | 0.15 | NKH          | glycine cleavage system protein H (aminomethyl carrier)                                        |
| 285464 | 0.15 | FLJ34443     | hypothetical protein FLJ34443                                                                  |
| 4925   | 0.15 | NUCB2        | nucleobindin 2                                                                                 |
| 81491  | 0.15 | PSP24B       | G protein-coupled receptor 63                                                                  |
| 92070  | 0.15 | MGC21675     | hypothetical protein MGC21675                                                                  |
| 127700 | 0.15 | OSCP1        | chromosome 1 open reading frame 102                                                            |
| 55666  | 0.14 | NPLOC4       | nuclear protein localization 4 homolog (S. cerevisiae)                                         |
| 151963 | 0.14 | C3orf59      | chromosome 3 open reading frame 59                                                             |
| 4835   | 0.14 | QR2          | NAD(P)H dehydrogenase, quinone 2                                                               |
| 90416  | 0.14 | MGC20481     | coiled-coil domain containing 32                                                               |
| 953    | 0.14 | NTPDase-1    | ectonucleoside triphosphate diphosphohydrolase 1                                               |
| 439921 | 0.14 | TMAP1        | matrix-remodelling associated 7                                                                |
| 286354 | 0.14 | NAG12        | chromosome 9 open reading frame 130                                                            |
| 977    | 0.14 | TSPAN24      | CD151 molecule (Raph blood group)                                                              |
