# Supplementary material for: Robust Prediction of Expression Differences among Human Individuals Using Only Genotype Information
Source: PubMed Central journal article supplement (PMC3610805; doi:10.1371/journal.pgen.1003396), 2013-03-28
Supplement: pgen.1003396.s010.pdf [file pgen.1003396.s010.pdf]

**Table S6. The list of the 100 top-predicted genes of the Elastic-Net model in the Cross-Pop cross-validation scheme**

| Entrez ID | Mean Test R <sup>2</sup> | Gene Symbol   | Gene Description                                                                     |
|-----------|--------------------------|---------------|--------------------------------------------------------------------------------------|
| 91612     | 0.81                     | My015         | churchill domain containing 1                                                        |
| 84833     | 0.79                     | USMG5         | upregulated during skeletal muscle growth 5 homolog (mouse)                          |
| 158160    | 0.71                     | MGC88684      | hydroxysteroid (17-beta) dehydrogenase 7 pseudogene 2                                |
| 3117      | 0.70                     | HLA-DQA       | major histocompatibility complex, class II, DQ alpha 1                               |
| 439921    | 0.69                     | TMAP1         | matrix-remodelling associated 7                                                      |
| 7311      | 0.68                     | UBA52         | ubiquitin A-52 residue ribosomal protein fusion product 1                            |
| 55228     | 0.64                     | FLJ10781      | hypothetical protein FLJ10781                                                        |
| 25902     | 0.62                     | MTHFD1L       | methylenetetrahydrofolate dehydrogenase (NADP+ dependent) 1-like                     |
| 10494     | 0.60                     | YSK1          | serine/threonine kinase 25 (STE20 homolog, yeast)                                    |
| 282991    | 0.59                     | RP11-316M21.4 | biogenesis of lysosome-related organelles complex-1, subunit 2                       |
| 3123      | 0.59                     | HLA-DRB1      | major histocompatibility complex, class II, DR beta 1                                |
| 3105      | 0.58                     | HLA-A         | major histocompatibility complex, class I, A                                         |
| 27004     | 0.57                     | TNG2          | T-cell leukemia/lymphoma 6                                                           |
| 2635      | 0.55                     | GBP3          | guanylate binding protein 3                                                          |
| 55755     | 0.53                     | MCPH3         | CDK5 regulatory subunit associated protein 2                                         |
| 84288     | 0.50                     | RP11-290P14.1 | EF-hand calcium binding domain 2                                                     |
| 829       | 0.50                     | CAZ1          | capping protein (actin filament) muscle Z-line, alpha 1                              |
| 84641     | 0.49                     | MGC117350     | hippocampus abundant transcript-like 1                                               |
| 91687     | 0.48                     | RP3-383J4.1   | centromere protein L                                                                 |
| 7536      | 0.48                     | ZNF162        | splicing factor 1                                                                    |
| 858       | 0.48                     | MGC12294      | caveolin 2                                                                           |
| 11118     | 0.47                     | BTN3A2        | butyrophilin, subfamily 3, member A2                                                 |
| 9623      | 0.47                     | TML1          | T-cell leukemia/lymphoma 1B                                                          |
| 84680     | 0.45                     | PHACS         | 1-aminocyclopropane-1-carboxylate synthase                                           |
| 80008     | 0.44                     | TMEM156       | transmembrane protein 156                                                            |
| 8312      | 0.44                     | MGC52315      | axin 1                                                                               |
| 3118      | 0.44                     | HLA-DXA       | major histocompatibility complex, class II, DQ alpha 2                               |
| 80817     | 0.43                     | PS1TP3        | KIAA1712                                                                             |
| 7773      | 0.42                     | ZNF230        | zinc finger protein 230                                                              |
| 26519     | 0.42                     | TIMM10        | translocase of inner mitochondrial membrane 10 homolog (yeast)                       |
| 8904      | 0.42                     | MGC1142       | copine I                                                                             |
| 4725      | 0.42                     | NDUFS5        | NADH dehydrogenase (ubiquinone) Fe-S protein 5, 15kDa (NADH-coenzyme Q reductase)    |
| 255403    | 0.41                     | ZNF718        | zinc finger protein 718                                                              |
| 219927    | 0.41                     | MRPL21        | mitochondrial ribosomal protein L21                                                  |
| 94101     | 0.41                     | ORMDL1        | ORM1-like 1 ( <i>S. cerevisiae</i> )                                                 |
| 115024    | 0.40                     | NT5C3L        | 5'-nucleotidase, cytosolic III-like                                                  |
| 27068     | 0.40                     | SID6-306      | pyrophosphatase (inorganic) 2                                                        |
| 349565    | 0.40                     | PNAT3         | nicotinamide nucleotide adenylyltransferase 3                                        |
| 977       | 0.39                     | TSPAN24       | CD151 molecule (Raph blood group)                                                    |
| 10953     | 0.39                     | TOMM34        | translocase of outer mitochondrial membrane 34                                       |
| 155368    | 0.39                     | WBSCR27       | Williams Beuren syndrome chromosome region 27                                        |
| 152815    | 0.38                     | THAP6         | THAP domain containing 6                                                             |
| 4731      | 0.38                     | NDUFV3        | NADH dehydrogenase (ubiquinone) flavoprotein 3, 10kDa                                |
| 7639      | 0.37                     | ZNF85         | zinc finger protein 85                                                               |
| 10352     | 0.37                     | WARS2         | tryptophanyl tRNA synthetase 2 (mitochondrial)                                       |
| 348094    | 0.36                     | MGC120307     | ankyrin repeat and death domain containing 1A                                        |
| 10694     | 0.36                     | KIAA0002      | chaperonin containing TCP1, subunit 8 (theta)                                        |
| 6168      | 0.36                     | RPL37A        | ribosomal protein L37a                                                               |
| 51097     | 0.36                     | SCCPDH        | saccharopine dehydrogenase (putative)                                                |
| 55556     | 0.36                     | TYMSAS        | enolase superfamily member 1                                                         |
| 130502    | 0.35                     | LOC130502     | similar to CG14894-PA                                                                |
| 6434      | 0.35                     | TRA2B         | splicing factor, arginine/serine-rich 10 (transformer 2 homolog, <i>Drosophila</i> ) |
| 7367      | 0.34                     | UGT2B17       | UDP glucuronosyltransferase 2 family, polypeptide B17                                |
| 54535     | 0.34                     | SBP           | coiled-coil alpha-helical rod protein 1                                              |
| 3652      | 0.34                     | IPP           | intracisternal A particle-promoted polypeptide                                       |
| 133383    | 0.33                     | MGC33648      | hypothetical protein MGC33648                                                        |
| 80221     | 0.33                     | FLJ20920      | hypothetical protein FLJ20920                                                        |
| 81889     | 0.33                     | YISKL         | fumarylacetoacetate hydrolase domain containing 1                                    |
| 10320     | 0.33                     | ZNFN1A1       | zinc finger protein, subfamily 1A, 1 ( <i>Ikaros</i> )                               |
| 2944      | 0.33                     | MU            | glutathione S-transferase M1                                                         |
| 79672     | 0.33                     | FN3KRP        | fructosamine-3-kinase-related protein                                                |
| 84516     | 0.32                     | p25           | dynactin 5 (p25)                                                                     |
| 93035     | 0.32                     | PKHDL1        | polycystic kidney and hepatic disease 1 (autosomal recessive)-like 1                 |
| 11116     | 0.31                     | FOP           | FGFR1 oncogene partner                                                               |

|        |      |               |                                                                                |
|--------|------|---------------|--------------------------------------------------------------------------------|
| 9172   | 0.31 | TTNAP         | myomesin (M-protein) 2, 165kDa                                                 |
| 126272 | 0.31 | FLJ38944      | EID-2-like inhibitor of differentiation-3                                      |
| 54822  | 0.31 | TRP-PLIK      | transient receptor potential cation channel, subfamily M, member 7             |
| 9056   | 0.31 | Y+LAT1        | solute carrier family 7 (cationic amino acid transporter, y+ system), member 7 |
| 1497   | 0.31 | PQLC4         | cystinosis, nephropathic                                                       |
| 131076 | 0.30 | FLJ33273      | coiled-coil domain containing 58                                               |
| 84284  | 0.30 | RP4-659I19.2  | chromosome 1 open reading frame 57                                             |
| 84617  | 0.30 | TUBB6         | tubulin, beta 6                                                                |
| 85019  | 0.30 | MGC138577     | chromosome 18 open reading frame 45                                            |
| 10645  | 0.30 | MGC15254      | calcium/calmodulin-dependent protein kinase 2, beta                            |
| 55588  | 0.30 | MED29         | intersex-like (Drosophila)                                                     |
| 63897  | 0.30 | FLJ22087      | amplified in breast cancer 1                                                   |
| 128272 | 0.30 | WGEF          | Rho guanine nucleotide exchange factor (GEF) 19                                |
| 147138 | 0.30 | TMC8          | transmembrane channel-like 8                                                   |
| 79762  | 0.30 | RP11-322F10.4 | chromosome 1 open reading frame 115                                            |
| 87769  | 0.29 | RP11-151A6.2  | hypothetical protein BC004360                                                  |
| 91647  | 0.29 | MGC29736      | ATP synthase mitochondrial F1 complex assembly factor 2                        |
| 64858  | 0.29 | SNM1B         | DNA cross-link repair 1B (PSO2 homolog, <i>S. cerevisiae</i> )                 |
| 1984   | 0.29 | uORF          | eukaryotic translation initiation factor 5A                                    |
| 400566 | 0.28 | LOC400566     | hypothetical gene supported by AK128660                                        |
| 54475  | 0.28 | Nle           | notchless homolog 1 (Drosophila)                                               |
| 1117   | 0.28 | YKL39         | chitinase 3-like 2                                                             |
| 23593  | 0.28 | SOUL          | heme binding protein 2                                                         |
| 283726 | 0.28 | DKFZp666G057  | hypothetical protein DKFZp666G057                                              |
| 27143  | 0.28 | PALD          | KIAA1274                                                                       |
| 113277 | 0.28 | TMEM106A      | transmembrane protein 106A                                                     |
| 115004 | 0.28 | MGC131892     | chromosome 6 open reading frame 150                                            |
| 51122  | 0.27 | MGC57611      | COMM domain containing 2                                                       |
| 55278  | 0.27 | QRSL1         | glutamyl-tRNA synthase (glutamine-hydrolyzing)-like 1                          |
| 10653  | 0.27 | SPINT2        | serine peptidase inhibitor, Kunitz type, 2                                     |
| 56927  | 0.27 | MGC14393      | G protein-coupled receptor 108                                                 |
| 51144  | 0.27 | KAR           | hydroxysteroid (17-beta) dehydrogenase 12                                      |
| 127428 | 0.27 | RP4-758J24.3  | chromosome 1 open reading frame 83                                             |
| 57001  | 0.27 | DC11          | ACN9 homolog ( <i>S. cerevisiae</i> )                                          |
| 10267  | 0.26 | RAMP1         | receptor (calcitonin) activity modifying protein 1                             |
| 127700 | 0.26 | OSCP1         | chromosome 1 open reading frame 102                                            |
