# Supplementary material for: Robust Prediction of Expression Differences among Human Individuals Using Only Genotype Information
Source: PubMed Central journal article supplement (PMC3610805; doi:10.1371/journal.pgen.1003396), 2013-03-28
Supplement: pgen.1003396.s011.pdf [file pgen.1003396.s011.pdf]

**Table S7. The list of the 100 top-predicted genes of the Single-SNP model in the Cross-Pop cross-validation scheme**

| Entrez ID | Mean Test R <sup>2</sup> | Gene Symbol   | Gene Description                                                                  |
|-----------|--------------------------|---------------|-----------------------------------------------------------------------------------|
| 3117      | 0.75                     | HLA-DQA       | major histocompatibility complex, class II, DQ alpha 1                            |
| 158160    | 0.70                     | MGC88684      | hydroxysteroid (17-beta) dehydrogenase 7 pseudogene 2                             |
| 27004     | 0.65                     | TNG2          | T-cell leukemia/lymphoma 6                                                        |
| 25902     | 0.57                     | MTHFD1L       | methylenetetrahydrofolate dehydrogenase (NADP+ dependent) 1-like                  |
| 6168      | 0.54                     | RPL37A        | ribosomal protein L37a                                                            |
| 439921    | 0.54                     | TMAP1         | matrix-remodelling associated 7                                                   |
| 91612     | 0.53                     | My015         | churchill domain containing 1                                                     |
| 4731      | 0.52                     | NDUFV3        | NADH dehydrogenase (ubiquinone) flavoprotein 3, 10kDa                             |
| 282991    | 0.50                     | RP11-316M21.4 | biogenesis of lysosome-related organelles complex-1, subunit 2                    |
| 9623      | 0.49                     | TML1          | T-cell leukemia/lymphoma 1B                                                       |
| 829       | 0.48                     | CAZ1          | capping protein (actin filament) muscle Z-line, alpha 1                           |
| 84833     | 0.48                     | USMG5         | upregulated during skeletal muscle growth 5 homolog (mouse)                       |
| 91687     | 0.47                     | RP3-383J4.1   | centromere protein L                                                              |
| 84641     | 0.46                     | MGC117350     | hippocampus abundant transcript-like 1                                            |
| 10494     | 0.45                     | YSK1          | serine/threonine kinase 25 (STE20 homolog, yeast)                                 |
| 7773      | 0.45                     | ZNF230        | zinc finger protein 230                                                           |
| 55755     | 0.43                     | MCPH3         | CDK5 regulatory subunit associated protein 2                                      |
| 84288     | 0.43                     | RP11-290P14.1 | EF-hand calcium binding domain 2                                                  |
| 4725      | 0.42                     | NDUFS5        | NADH dehydrogenase (ubiquinone) Fe-S protein 5, 15kDa (NADH-coenzyme Q reductase) |
| 115024    | 0.41                     | NT5C3L        | 5'&apos;-nucleotidase, cytosolic III-like                                         |
| 7639      | 0.41                     | ZNF85         | zinc finger protein 85                                                            |
| 80008     | 0.41                     | TMEM156       | transmembrane protein 156                                                         |
| 349565    | 0.41                     | PNAT3         | nicotinamide nucleotide adenyltransferase 3                                       |
| 151246    | 0.40                     | TRIPIN        | shugoshin-like 2 (S. pombe)                                                       |
| 219927    | 0.40                     | MRPL21        | mitochondrial ribosomal protein L21                                               |
| 80817     | 0.40                     | PS1TP3        | KIAA1712                                                                          |
| 27068     | 0.39                     | SID6-306      | pyrophosphatase (inorganic) 2                                                     |
| 858       | 0.39                     | MGC12294      | caveolin 2                                                                        |
| 11118     | 0.39                     | BTN3A2        | butyrophilin, subfamily 3, member A2                                              |
| 133383    | 0.39                     | MGC33648      | hypothetical protein MGC33648                                                     |
| 155368    | 0.39                     | WBCSR27       | Williams Beuren syndrome chromosome region 27                                     |
| 91647     | 0.38                     | MGC29736      | ATP synthase mitochondrial F1 complex assembly factor 2                           |
| 2944      | 0.38                     | MU            | glutathione S-transferase M1                                                      |
| 8904      | 0.38                     | MGC1142       | copine I                                                                          |
| 10694     | 0.37                     | KIAA0002      | chaperonin containing TCP1, subunit 8 (theta)                                     |
| 7536      | 0.37                     | ZNF162        | splicing factor 1                                                                 |
| 55228     | 0.37                     | FLJ10781      | hypothetical protein FLJ10781                                                     |
| 255403    | 0.37                     | ZNF718        | zinc finger protein 718                                                           |
| 2635      | 0.36                     | GBP3          | guanylate binding protein 3                                                       |
| 10320     | 0.36                     | ZNFN1A1       | zinc finger protein, subfamily 1A, 1 (Ikaros)                                     |
| 26519     | 0.36                     | TIMM10        | translocase of inner mitochondrial membrane 10 homolog (yeast)                    |
| 8312      | 0.35                     | MGC52315      | axin 1                                                                            |
| 84680     | 0.35                     | PHACS         | 1-aminocyclopropane-1-carboxylate synthase                                        |
| 11116     | 0.34                     | FOP           | FGFR1 oncogene partner                                                            |
| 81889     | 0.34                     | YISKL         | fumarylacetoacetate hydrolase domain containing 1                                 |
| 93100     | 0.33                     | PP3856        | nicotinate phosphoribosyltransferase domain containing 1                          |
| 8878      | 0.33                     | ZIP3          | sequestosome 1                                                                    |
| 130502    | 0.33                     | LOC130502     | similar to CG14894-PA                                                             |
| 55871     | 0.33                     | CBWD1         | COBW domain containing 1                                                          |
| 10953     | 0.33                     | TOMM34        | translocase of outer mitochondrial membrane 34                                    |
| 10267     | 0.32                     | RAMP1         | receptor (calcitonin) activity modifying protein 1                                |
| 131076    | 0.32                     | FLJ33273      | coiled-coil domain containing 58                                                  |
| 6434      | 0.32                     | TRA2B         | splicing factor, arginine/serine-rich 10 (transformer 2 homolog, Drosophila)      |
| 147138    | 0.32                     | TMC8          | transmembrane channel-like 8                                                      |
| 55588     | 0.31                     | MED29         | intersex-like (Drosophila)                                                        |
| 3118      | 0.31                     | HLA-DXA       | major histocompatibility complex, class II, DQ alpha 2                            |
| 7311      | 0.31                     | UBA52         | ubiquitin A-52 residue ribosomal protein fusion product 1                         |
| 3652      | 0.31                     | IPP           | intracisternal A particle-promoted polypeptide                                    |
| 51097     | 0.30                     | SCCPDH        | saccharopine dehydrogenase (putative)                                             |
| 51144     | 0.30                     | KAR           | hydroxysteroid (17-beta) dehydrogenase 12                                         |
| 1497      | 0.30                     | PQLC4         | cystinosis, nephropathic                                                          |
| 79672     | 0.29                     | FN3KRP        | fructosamine-3-kinase-related protein                                             |
| 9172      | 0.29                     | TTNAP         | myomesin (M-protein) 2, 165kDa                                                    |
| 87769     | 0.28                     | RP11-151A6.2  | hypothetical protein BC004360                                                     |

|        |      |              |                                                                           |
|--------|------|--------------|---------------------------------------------------------------------------|
| 197322 | 0.27 | LOC197322    | hypothetical protein LOC197322                                            |
| 54822  | 0.27 | TRP-PLIK     | transient receptor potential cation channel, subfamily M, member 7        |
| 115004 | 0.27 | MGC131892    | chromosome 6 open reading frame 150                                       |
| 56927  | 0.27 | MGC14393     | G protein-coupled receptor 108                                            |
| 51122  | 0.27 | MGC57611     | COMM domain containing 2                                                  |
| 55957  | 0.27 | MGC9505      | protein F25965                                                            |
| 10653  | 0.26 | SPINT2       | serine peptidase inhibitor, Kunitz type, 2                                |
| 3105   | 0.26 | HLA-A        | major histocompatibility complex, class I, A                              |
| 128272 | 0.26 | WGEF         | Rho guanine nucleotide exchange factor (GEF) 19                           |
| 1984   | 0.26 | uORF         | eukaryotic translation initiation factor 5A                               |
| 22900  | 0.26 | TUCAN        | caspase recruitment domain family, member 8                               |
| 84617  | 0.26 | TUBB6        | tubulin, beta 6                                                           |
| 11014  | 0.25 | KDELR2       | KDEL (Lys-Asp-Glu-Leu) endoplasmic reticulum protein retention receptor 2 |
| 55556  | 0.25 | TYMSAS       | enolase superfamily member 1                                              |
| 80221  | 0.25 | FLJ20920     | hypothetical protein FLJ20920                                             |
| 80315  | 0.25 | KIAA1673     | cytoplasmic polyadenylation element binding protein 4                     |
| 1429   | 0.25 | FLJ41475     | crystallin, zeta (quinone reductase)                                      |
| 93349  | 0.24 | MGC132667    | hypothetical protein BC004921                                             |
| 127428 | 0.24 | RP4-758J24.3 | chromosome 1 open reading frame 83                                        |
| 9794   | 0.24 | MAML1        | mastermind-like 1 (Drosophila)                                            |
| 84284  | 0.24 | RP4-659I19.2 | chromosome 1 open reading frame 57                                        |
| 127700 | 0.24 | OSCP1        | chromosome 1 open reading frame 102                                       |
| 113277 | 0.24 | TMEM106A     | transmembrane protein 106A                                                |
| 64858  | 0.24 | SNM1B        | DNA cross-link repair 1B (PSO2 homolog, <i>S. cerevisiae</i> )            |
| 81544  | 0.24 | PP1665       | glycerophosphodiester phosphodiesterase domain containing 5               |
| 54475  | 0.23 | Nle          | notchless homolog 1 (Drosophila)                                          |
| 8310   | 0.23 | ACOX3        | acyl-Coenzyme A oxidase 3, pristanoyl                                     |
| 1479   | 0.23 | MGC75122     | cleavage stimulation factor, 3' pre-RNA, subunit 3, 77kDa                 |
| 7390   | 0.23 | UROS         | uroporphyrinogen III synthase (congenital erythropoietic porphyria)       |
| 1776   | 0.23 | LSD          | deoxyribonuclease I-like 3                                                |
| 10905  | 0.23 | MAN1B        | mannosidase, alpha, class 1A, member 2                                    |
| 54535  | 0.23 | SBP          | coiled-coil alpha-helical rod protein 1                                   |
| 147968 | 0.22 | MGC20576     | calpain 12                                                                |
| 283726 | 0.22 | DKFZp666G057 | hypothetical protein DKFZp666G057                                         |
| 26284  | 0.22 | HERA-B       | Era G-protein-like 1 ( <i>E. coli</i> )                                   |
| 1912   | 0.22 | PHC2         | polyhomeotic-like 2 (Drosophila)                                          |
