# Supplementary material for: Robust Prediction of Expression Differences among Human Individuals Using Only Genotype Information
Source: PubMed Central journal article supplement (PMC3610805; doi:10.1371/journal.pgen.1003396), 2013-03-28
Supplement: pgen.1003396.s012.pdf [file pgen.1003396.s012.pdf]

**Table S8. The list of the 100 top-predicted genes of the KNN model in the Mixed-Pop cross-validation scheme**

| Entrez ID | Mean Test R <sup>2</sup> | Gene Symbol   | Gene Description                                                                  |
|-----------|--------------------------|---------------|-----------------------------------------------------------------------------------|
| 91612     | 0.81                     | My015         | churchill domain containing 1                                                     |
| 6231      | 0.74                     | RPS26         | ribosomal protein S26                                                             |
| 94101     | 0.74                     | ORMDL1        | ORM1-like 1 ( <i>S. cerevisiae</i> )                                              |
| 93035     | 0.70                     | PKHDL1        | polycystic kidney and hepatic disease 1 (autosomal recessive)-like 1              |
| 84641     | 0.70                     | MGC117350     | hippocampus abundant transcript-like 1                                            |
| 7367      | 0.67                     | UGT2B17       | UDP glucuronosyltransferase 2 family, polypeptide B17                             |
| 7311      | 0.67                     | UBA52         | ubiquitin A-52 residue ribosomal protein fusion product 1                         |
| 84833     | 0.67                     | USMG5         | upregulated during skeletal muscle growth 5 homolog (mouse)                       |
| 282991    | 0.62                     | RP11-316M21.4 | biogenesis of lysosome-related organelles complex-1, subunit 2                    |
| 3123      | 0.62                     | HLA-DRB1      | major histocompatibility complex, class II, DR beta 1                             |
| 84288     | 0.62                     | RP11-290P14.1 | EF-hand calcium binding domain 2                                                  |
| 158160    | 0.62                     | MGC88684      | hydroxysteroid (17-beta) dehydrogenase 7 pseudogene 2                             |
| 9045      | 0.61                     | RPL14         | ribosomal protein L14                                                             |
| 3663      | 0.61                     | IRF5          | interferon regulatory factor 5                                                    |
| 858       | 0.59                     | MGC12294      | caveolin 2                                                                        |
| 3105      | 0.58                     | HLA-A         | major histocompatibility complex, class I, A                                      |
| 3127      | 0.55                     | HLA-DRB5      | major histocompatibility complex, class II, DR beta 5                             |
| 143570    | 0.53                     | XRRA1         | X-ray radiation resistance associated 1                                           |
| 7536      | 0.52                     | ZNF162        | splicing factor 1                                                                 |
| 3117      | 0.51                     | HLA-DQA       | major histocompatibility complex, class II, DQ alpha 1                            |
| 348094    | 0.47                     | MGC120307     | ankyrin repeat and death domain containing 1A                                     |
| 829       | 0.45                     | CAZ1          | capping protein (actin filament) muscle Z-line, alpha 1                           |
| 4725      | 0.44                     | NDUFS5        | NADH dehydrogenase (ubiquinone) Fe-S protein 5, 15kDa (NADH-coenzyme Q reductase) |
| 54879     | 0.44                     | STLR          | suppression of tumorigenicity 7 like                                              |
| 10494     | 0.43                     | YSK1          | serine/threonine kinase 25 (STE20 homolog, yeast)                                 |
| 439921    | 0.42                     | TMAP1         | matrix-remodelling associated 7                                                   |
| 1965      | 0.41                     | EIF2S1        | eukaryotic translation initiation factor 2, subunit 1 alpha, 35kDa                |
| 133383    | 0.40                     | MGC33648      | hypothetical protein MGC33648                                                     |
| 87769     | 0.40                     | RP11-151A6.2  | hypothetical protein BC004360                                                     |
| 91687     | 0.40                     | RP3-383J4.1   | centromere protein L                                                              |
| 8904      | 0.39                     | MGC1142       | copine I                                                                          |
| 155368    | 0.39                     | WBSCR27       | Williams Beuren syndrome chromosome region 27                                     |
| 23593     | 0.38                     | SOUL          | heme binding protein 2                                                            |
| 79618     | 0.38                     | PBHNF         | homeobox containing 1                                                             |
| 55556     | 0.37                     | TYMSAS        | enolase superfamily member 1                                                      |
| 84680     | 0.36                     | PHACS         | 1-aminocyclopropane-1-carboxylate synthase                                        |
| 10412     | 0.36                     | YR-29         | TGF beta-inducible nuclear protein 1                                              |
| 219927    | 0.36                     | MRPL21        | mitochondrial ribosomal protein L21                                               |
| 10233     | 0.35                     | LRRC23        | leucine rich repeat containing 23                                                 |
| 9419      | 0.35                     | HSPC139       | postsynaptic protein CRIPT                                                        |
| 93100     | 0.35                     | PP3856        | nicotinate phosphoribosyltransferase domain containing 1                          |
| 6199      | 0.34                     | STK14B        | ribosomal protein S6 kinase, 70kDa, polypeptide 2                                 |
| 131076    | 0.34                     | FLJ33273      | coiled-coil domain containing 58                                                  |
| 255403    | 0.34                     | ZNF718        | zinc finger protein 718                                                           |
| 400566    | 0.34                     | LOC400566     | hypothetical gene supported by AK128660                                           |
| 318       | 0.34                     | NUDT2         | nudix (nucleoside diphosphate linked moiety X)-type motif 2                       |
| 5411      | 0.34                     | SDK3          | pinin, desmosome associated protein                                               |
| 10905     | 0.33                     | MAN1B         | mannosidase, alpha, class 1A, member 2                                            |
| 162394    | 0.33                     | SLFN5         | schlafen family member 5                                                          |
| 11118     | 0.33                     | BTN3A2        | butyrophilin, subfamily 3, member A2                                              |
| 2635      | 0.32                     | GBP3          | guanylate binding protein 3                                                       |
| 11147     | 0.32                     | HHLA3         | HERV-H LTR-associating 3                                                          |
| 5190      | 0.32                     | PXAAA1        | peroxisomal biogenesis factor 6                                                   |
| 6168      | 0.32                     | RPL37A        | ribosomal protein L37a                                                            |
| 84545     | 0.31                     | MRPL43        | mitochondrial ribosomal protein L43                                               |
| 81889     | 0.31                     | YISKL         | fumarylacetoacetate hydrolase domain containing 1                                 |
| 127255    | 0.31                     | MGC22773      | leucine rich repeat containing 44                                                 |
| 26519     | 0.31                     | TIMM10        | translocase of inner mitochondrial membrane 10 homolog (yeast)                    |
| 55755     | 0.31                     | MCPH3         | CDK5 regulatory subunit associated protein 2                                      |
| 84314     | 0.30                     | TMEM107       | transmembrane protein 107                                                         |

|        |      |              |                                                                                         |
|--------|------|--------------|-----------------------------------------------------------------------------------------|
| 3652   | 0.29 | IPP          | intracisternal A particle-promoted polypeptide                                          |
| 261726 | 0.29 | TIPRL        | TIP41, TOR signalling pathway regulator-like ( <i>S. cerevisiae</i> )                   |
| 197322 | 0.29 | LOC197322    | hypothetical protein LOC197322                                                          |
| 115024 | 0.29 | NT5C3L       | 5'-nucleotidase, cytosolic III-like                                                     |
| 152815 | 0.28 | THAP6        | THAP domain containing 6                                                                |
| 219736 | 0.28 | STOX1        | storkhead box 1                                                                         |
| 8034   | 0.28 | SLC25A16     | solute carrier family 25 (mitochondrial carrier; Graves disease autoantigen), member 16 |
| 3118   | 0.28 | HLA-DXA      | major histocompatibility complex, class II, DQ alpha 2                                  |
| 84221  | 0.27 | MGC99490     | chromosome 21 open reading frame 56                                                     |
| 84617  | 0.27 | TUBB6        | tubulin, beta 6                                                                         |
| 55228  | 0.27 | FLJ10781     | hypothetical protein FLJ10781                                                           |
| 146279 | 0.27 | FLJ32871     | hypothetical protein FLJ32871                                                           |
| 55871  | 0.27 | CBWD1        | COBW domain containing 1                                                                |
| 4552   | 0.26 | MTRR         | 5-methyltetrahydrofolate-homocysteine methyltransferase reductase                       |
| 51101  | 0.26 | CGI-62       | chromosome 8 open reading frame 70                                                      |
| 63897  | 0.26 | FLJ22087     | amplified in breast cancer 1                                                            |
| 84676  | 0.26 | TRIM63       | tripartite motif-containing 63                                                          |
| 4835   | 0.26 | QR2          | NAD(P)H dehydrogenase, quinone 2                                                        |
| 51074  | 0.26 | MMRP19       | APAF1 interacting protein                                                               |
| 283726 | 0.25 | DKFZp666G057 | hypothetical protein DKFZp666G057                                                       |
| 3059   | 0.25 | HS1          | hematopoietic cell-specific Lyn substrate 1                                             |
| 80008  | 0.25 | TMEM156      | transmembrane protein 156                                                               |
| 57602  | 0.25 | USP36        | ubiquitin specific peptidase 36                                                         |
| 51097  | 0.25 | SCCPDH       | saccharopine dehydrogenase (putative)                                                   |
| 54535  | 0.25 | SBP          | coiled-coil alpha-helical rod protein 1                                                 |
| 55278  | 0.24 | QRSL1        | glutaminyl-tRNA synthase (glutamine-hydrolyzing)-like 1                                 |
| 1635   | 0.24 | MGC111062    | dCMP deaminase                                                                          |
| 1912   | 0.24 | PHC2         | polyhomeotic-like 2 ( <i>Drosophila</i> )                                               |
| 64858  | 0.23 | SNM1B        | DNA cross-link repair 1B (PSO2 homolog, <i>S. cerevisiae</i> )                          |
| 10694  | 0.23 | KIAA0002     | chaperonin containing TCP1, subunit 8 (theta)                                           |
| 23008  | 0.23 | KIAA0265     | KIAA0265 protein                                                                        |
| 2683   | 0.23 | MGC50983     | UDP-Gal:betaGlcNAc beta 1,4- galactosyltransferase, polypeptide 1                       |
| 8312   | 0.23 | MGC52315     | axin 1                                                                                  |
| 7639   | 0.23 | ZNF85        | zinc finger protein 85                                                                  |
| 2021   | 0.23 | FLJ27463     | endonuclease G                                                                          |
| 7084   | 0.22 | TK2          | thymidine kinase 2, mitochondrial                                                       |
| 10438  | 0.22 | SUNCOR       | nuclear DNA-binding protein                                                             |
| 953    | 0.22 | NTPDase-1    | ectonucleoside triphosphate diphosphohydrolase 1                                        |
| 10352  | 0.22 | WARS2        | tryptophanyl tRNA synthetase 2 (mitochondrial)                                          |
| 915    | 0.22 | T3D          | CD3d molecule, delta (CD3-TCR complex)                                                  |
