# Supplementary material for: Robust Prediction of Expression Differences among Human Individuals Using Only Genotype Information
Source: PubMed Central journal article supplement (PMC3610805; doi:10.1371/journal.pgen.1003396), 2013-03-28
Supplement: pgen.1003396.s013.pdf [file pgen.1003396.s013.pdf]

**Table S9. The list of the 100 top-predicted genes of the Elastic-Net model in the Mixed-Pop cross-validation scheme**

| Entrez ID | Mean Test R <sup>2</sup> | Gene Symbol   | Gene Description                                                                  |
|-----------|--------------------------|---------------|-----------------------------------------------------------------------------------|
| 91612     | 0.80                     | My015         | churchill domain containing 1                                                     |
| 94101     | 0.80                     | ORMDL1        | ORM1-like 1 ( <i>S. cerevisiae</i> )                                              |
| 7311      | 0.79                     | UBA52         | ubiquitin A-52 residue ribosomal protein fusion product 1                         |
| 84833     | 0.79                     | USMG5         | upregulated during skeletal muscle growth 5 homolog (mouse)                       |
| 3123      | 0.78                     | HLA-DRB1      | major histocompatibility complex, class II, DR beta 1                             |
| 3117      | 0.77                     | HLA-DQA       | major histocompatibility complex, class II, DQ alpha 1                            |
| 6231      | 0.75                     | RPS26         | ribosomal protein S26                                                             |
| 439921    | 0.74                     | TMAP1         | matrix-remodelling associated 7                                                   |
| 27004     | 0.73                     | TNG2          | T-cell leukemia/lymphoma 6                                                        |
| 93035     | 0.73                     | PKHDL1        | polycystic kidney and hepatic disease 1 (autosomal recessive)-like 1              |
| 158160    | 0.72                     | MGC88684      | hydroxysteroid (17-beta) dehydrogenase 7 pseudogene 2                             |
| 3105      | 0.68                     | HLA-A         | major histocompatibility complex, class I, A                                      |
| 3663      | 0.67                     | IRF5          | interferon regulatory factor 5                                                    |
| 400566    | 0.66                     | LOC400566     | hypothetical gene supported by AK128660                                           |
| 84288     | 0.65                     | RP11-290P14.1 | EF-hand calcium binding domain 2                                                  |
| 84680     | 0.65                     | PHACS         | 1-aminocyclopropane-1-carboxylate synthase                                        |
| 3127      | 0.61                     | HLA-DRB5      | major histocompatibility complex, class II, DR beta 5                             |
| 2635      | 0.60                     | GBP3          | guanylate binding protein 3                                                       |
| 3118      | 0.59                     | HLA-DXA       | major histocompatibility complex, class II, DQ alpha 2                            |
| 858       | 0.59                     | MGC12294      | caveolin 2                                                                        |
| 7536      | 0.58                     | ZNF162        | splicing factor 1                                                                 |
| 153733    | 0.57                     | MGC39633      | coiled-coil domain containing 112                                                 |
| 9045      | 0.56                     | RPL14         | ribosomal protein L14                                                             |
| 282991    | 0.56                     | RP11-316M21.4 | biogenesis of lysosome-related organelles complex-1, subunit 2                    |
| 10494     | 0.56                     | YSK1          | serine/threonine kinase 25 (STE20 homolog, yeast)                                 |
| 93100     | 0.55                     | PP3856        | nicotinate phosphoribosyltransferase domain containing 1                          |
| 6168      | 0.55                     | RPL37A        | ribosomal protein L37a                                                            |
| 4731      | 0.55                     | NDUFB3        | NADH dehydrogenase (ubiquinone) flavoprotein 3, 10kDa                             |
| 2944      | 0.52                     | MU            | glutathione S-transferase M1                                                      |
| 55228     | 0.52                     | FLJ10781      | hypothetical protein FLJ10781                                                     |
| 9623      | 0.51                     | TML1          | T-cell leukemia/lymphoma 1B                                                       |
| 87769     | 0.51                     | RP11-151A6.2  | hypothetical protein BC004360                                                     |
| 348094    | 0.50                     | MGC120307     | ankyrin repeat and death domain containing 1A                                     |
| 197322    | 0.50                     | LOC197322     | hypothetical protein LOC197322                                                    |
| 55755     | 0.50                     | MCPH3         | CDK5 regulatory subunit associated protein 2                                      |
| 255403    | 0.50                     | ZNF718        | zinc finger protein 718                                                           |
| 143570    | 0.50                     | XRRA1         | X-ray radiation resistance associated 1                                           |
| 79618     | 0.49                     | PBHNF         | homeobox containing 1                                                             |
| 829       | 0.49                     | CAZ1          | capping protein (actin filament) muscle Z-line, alpha 1                           |
| 11118     | 0.49                     | BTN3A2        | butyrophilin, subfamily 3, member A2                                              |
| 84641     | 0.48                     | MGC117350     | hippocampus abundant transcript-like 1                                            |
| 8312      | 0.48                     | MGC52315      | axin 1                                                                            |
| 131076    | 0.48                     | FLJ33273      | coiled-coil domain containing 58                                                  |
| 55556     | 0.47                     | TYMSAS        | enolase superfamily member 1                                                      |
| 349565    | 0.47                     | PNAT3         | nicotinamide nucleotide adenyltransferase 3                                       |
| 25902     | 0.47                     | MTHFD1L       | methylenetetrahydrofolate dehydrogenase (NADP+ dependent) 1-like                  |
| 6199      | 0.46                     | STK14B        | ribosomal protein S6 kinase, 70kDa, polypeptide 2                                 |
| 91687     | 0.46                     | RP3-383J4.1   | centromere protein L                                                              |
| 54879     | 0.46                     | STLR          | suppression of tumorigenicity 7 like                                              |
| 23593     | 0.45                     | SOUL          | heme binding protein 2                                                            |
| 155368    | 0.44                     | WBSCR27       | Williams Beuren syndrome chromosome region 27                                     |
| 4725      | 0.44                     | NDUFS5        | NADH dehydrogenase (ubiquinone) Fe-S protein 5, 15kDa (NADH-coenzyme Q reductase) |
| 7367      | 0.44                     | UGT2B17       | UDP glucuronosyltransferase 2 family, polypeptide B17                             |
| 133383    | 0.43                     | MGC33648      | hypothetical protein MGC33648                                                     |
| 27068     | 0.43                     | SID6-306      | pyrophosphatase (inorganic) 2                                                     |
| 10438     | 0.43                     | SUNCOR        | nuclear DNA-binding protein                                                       |
| 7773      | 0.42                     | ZNF230        | zinc finger protein 230                                                           |
| 219927    | 0.42                     | MRPL21        | mitochondrial ribosomal protein L21                                               |
| 283726    | 0.42                     | DKFZp666G057  | hypothetical protein DKFZp666G057                                                 |

|        |      |          |                                                                       |
|--------|------|----------|-----------------------------------------------------------------------|
| 1965   | 0.41 | EIF2S1   | eukaryotic translation initiation factor 2, subunit 1 alpha, 35kDa    |
| 51097  | 0.41 | SCCPDH   | saccharopine dehydrogenase (putative)                                 |
| 10352  | 0.41 | WARS2    | tryptophanyl tRNA synthetase 2 (mitochondrial)                        |
| 10694  | 0.40 | KIAA0002 | chaperonin containing TCP1, subunit 8 (theta)                         |
| 162394 | 0.40 | SLFN5    | schlafen family member 5                                              |
| 80817  | 0.40 | PS1TP3   | KIAA1712                                                              |
| 11147  | 0.40 | HHLA3    | HERV-H LTR-associating 3                                              |
| 55278  | 0.40 | QRSL1    | glutaminyl-tRNA synthase (glutamine-hydrolyzing)-like 1               |
| 318    | 0.40 | NUDT2    | nudix (nucleoside diphosphate linked moiety X)-type motif 2           |
| 84221  | 0.39 | MGC99490 | chromosome 21 open reading frame 56                                   |
| 80221  | 0.39 | FLJ20920 | hypothetical protein FLJ20920                                         |
| 10905  | 0.39 | MAN1B    | mannosidase, alpha, class 1A, member 2                                |
| 5190   | 0.39 | PXAAA1   | peroxisomal biogenesis factor 6                                       |
| 261726 | 0.39 | TIPRL    | TIP41, TOR signalling pathway regulator-like ( <i>S. cerevisiae</i> ) |
| 8904   | 0.39 | MGC1142  | copine I                                                              |
| 8605   | 0.37 | PLA2G4C  | phospholipase A2, group IVC (cytosolic, calcium-independent)          |
| 80008  | 0.37 | TMEM156  | transmembrane protein 156                                             |
| 115024 | 0.37 | NT5C3L   | 5'-nucleotidase, cytosolic III-like                                   |
| 10953  | 0.37 | TOMM34   | translocase of outer mitochondrial membrane 34                        |
| 54535  | 0.37 | SBP      | coiled-coil alpha-helical rod protein 1                               |
| 5434   | 0.37 | XAP4     | polymerase (RNA) II (DNA directed) polypeptide E, 25kDa               |
| 10077  | 0.37 | TSSC6    | tetraspanin 32                                                        |
| 9317   | 0.37 | RPR-1    | phosphotriesterase related                                            |
| 11116  | 0.37 | FOP      | FGFR1 oncogene partner                                                |
| 55871  | 0.36 | CBWD1    | COBW domain containing 1                                              |
| 1117   | 0.36 | YKL39    | chitinase 3-like 2                                                    |
| 64858  | 0.36 | SNM1B    | DNA cross-link repair 1B (PSO2 homolog, <i>S. cerevisiae</i> )        |
| 10233  | 0.36 | LRRC23   | leucine rich repeat containing 23                                     |
| 10267  | 0.36 | RAMP1    | receptor (calcitonin) activity modifying protein 1                    |
| 26519  | 0.35 | TIMM10   | translocase of inner mitochondrial membrane 10 homolog (yeast)        |
| 10645  | 0.35 | MGC15254 | calcium/calmodulin-dependent protein kinase kinase 2, beta            |
| 10320  | 0.35 | ZNFN1A1  | zinc finger protein, subfamily 1A, 1 (Ikaros)                         |
| 1912   | 0.35 | PHC2     | polyhomeotic-like 2 ( <i>Drosophila</i> )                             |
| 7639   | 0.35 | ZNF85    | zinc finger protein 85                                                |
| 79672  | 0.35 | FN3KRP   | fructosamine-3-kinase-related protein                                 |
| 339231 | 0.34 | ARL16    | ADP-ribosylation factor-like 16                                       |
| 51074  | 0.34 | MMRP19   | APAF1 interacting protein                                             |
| 126272 | 0.34 | FLJ38944 | EID-2-like inhibitor of differentiation-3                             |
| 22927  | 0.34 | SERBP1L  | hyaluronan binding protein 4                                          |
| 25885  | 0.34 | RPO1-4   | polymerase (RNA) I polypeptide A, 194kDa                              |
| 84314  | 0.34 | TMEM107  | transmembrane protein 107                                             |
