# Supplementary material for: Robust Prediction of Expression Differences among Human Individuals Using Only Genotype Information
Source: PubMed Central journal article supplement (PMC3610805; doi:10.1371/journal.pgen.1003396), 2013-03-28
Supplement: pgen.1003396.s014.pdf [file pgen.1003396.s014.pdf]

**Table S10. The list of the 100 top-predicted genes of the Single-SNP model in the Mixed-Pop cross-validation scheme**

| Entrez ID | Mean Test R <sup>2</sup> | Gene Symbol   | Gene Description                                                                  |
|-----------|--------------------------|---------------|-----------------------------------------------------------------------------------|
| 3117      | 0.75                     | HLA-DQA       | major histocompatibility complex, class II, DQ alpha 1                            |
| 91612     | 0.72                     | My015         | churchill domain containing 1                                                     |
| 27004     | 0.71                     | TNG2          | T-cell leukemia/lymphoma 6                                                        |
| 158160    | 0.70                     | MGC88684      | hydroxysteroid (17-beta) dehydrogenase 7 pseudogene 2                             |
| 84833     | 0.69                     | USMG5         | upregulated during skeletal muscle growth 5 homolog (mouse)                       |
| 7311      | 0.64                     | UBA52         | ubiquitin A-52 residue ribosomal protein fusion product 1                         |
| 93035     | 0.63                     | PKHDL1        | polycystic kidney and hepatic disease 1 (autosomal recessive)-like 1              |
| 282991    | 0.63                     | RP11-316M21.4 | biogenesis of lysosome-related organelles complex-1, subunit 2                    |
| 6168      | 0.61                     | RPL37A        | ribosomal protein L37a                                                            |
| 83543     | 0.60                     | MGC29466      | chromosome 9 open reading frame 58                                                |
| 25902     | 0.59                     | MTHFD1L       | methylenetetrahydrofolate dehydrogenase (NADP+ dependent) 1-like                  |
| 439921    | 0.56                     | TMAP1         | matrix-remodelling associated 7                                                   |
| 4731      | 0.56                     | NDUFV3        | NADH dehydrogenase (ubiquinone) flavoprotein 3, 10kDa                             |
| 94101     | 0.55                     | ORMDL1        | ORM1-like 1 ( <i>S. cerevisiae</i> )                                              |
| 84288     | 0.55                     | RP11-290P14.1 | EF-hand calcium binding domain 2                                                  |
| 84641     | 0.54                     | MGC117350     | hippocampus abundant transcript-like 1                                            |
| 10494     | 0.54                     | YSK1          | serine/threonine kinase 25 (STE20 homolog, yeast)                                 |
| 9623      | 0.53                     | TML1          | T-cell leukemia/lymphoma 1B                                                       |
| 84680     | 0.53                     | PHACS         | 1-aminocyclopropane-1-carboxylate synthase                                        |
| 858       | 0.52                     | MGC12294      | caveolin 2                                                                        |
| 6231      | 0.51                     | RPS26         | ribosomal protein S26                                                             |
| 91687     | 0.51                     | RP3-383J4.1   | centromere protein L                                                              |
| 829       | 0.51                     | CAZ1          | capping protein (actin filament) muscle Z-line, alpha 1                           |
| 3663      | 0.50                     | IRF5          | interferon regulatory factor 5                                                    |
| 255403    | 0.49                     | ZNF718        | zinc finger protein 718                                                           |
| 55755     | 0.48                     | MCPH3         | CDK5 regulatory subunit associated protein 2                                      |
| 348094    | 0.47                     | MGC120307     | ankyrin repeat and death domain containing 1A                                     |
| 6199      | 0.47                     | STK14B        | ribosomal protein S6 kinase, 70kDa, polypeptide 2                                 |
| 219927    | 0.45                     | MRPL21        | mitochondrial ribosomal protein L21                                               |
| 87769     | 0.45                     | RP11-151A6.2  | hypothetical protein BC004360                                                     |
| 133383    | 0.45                     | MGC33648      | hypothetical protein MGC33648                                                     |
| 8312      | 0.45                     | MGC52315      | axin 1                                                                            |
| 155368    | 0.44                     | WBSCR27       | Williams Beuren syndrome chromosome region 27                                     |
| 3105      | 0.44                     | HLA-A         | major histocompatibility complex, class I, A                                      |
| 7773      | 0.44                     | ZNF230        | zinc finger protein 230                                                           |
| 2635      | 0.44                     | GBP3          | guanylate binding protein 3                                                       |
| 2944      | 0.44                     | MU            | glutathione S-transferase M1                                                      |
| 55228     | 0.43                     | FLJ10781      | hypothetical protein FLJ10781                                                     |
| 80008     | 0.43                     | TMEM156       | transmembrane protein 156                                                         |
| 7536      | 0.42                     | ZNF162        | splicing factor 1                                                                 |
| 27068     | 0.42                     | SID6-306      | pyrophosphatase (inorganic) 2                                                     |
| 3118      | 0.42                     | HLA-DXA       | major histocompatibility complex, class II, DQ alpha 2                            |
| 131076    | 0.42                     | FLJ33273      | coiled-coil domain containing 58                                                  |
| 151246    | 0.42                     | TRIPIN        | shugoshin-like 2 ( <i>S. pombe</i> )                                              |
| 9045      | 0.42                     | RPL14         | ribosomal protein L14                                                             |
| 115024    | 0.41                     | NT5C3L        | 5'-nucleotidase, cytosolic III-like                                               |
| 283726    | 0.41                     | DKFZp666G057  | hypothetical protein DKFZp666G057                                                 |
| 4725      | 0.41                     | NDUFS5        | NADH dehydrogenase (ubiquinone) Fe-S protein 5, 15kDa (NADH-coenzyme Q reductase) |
| 80817     | 0.41                     | PS1TP3        | KIAA1712                                                                          |
| 7639      | 0.41                     | ZNF85         | zinc finger protein 85                                                            |
| 10953     | 0.40                     | TOMM34        | translocase of outer mitochondrial membrane 34                                    |
| 11118     | 0.40                     | BTN3A2        | butyrophilin, subfamily 3, member A2                                              |
| 197322    | 0.40                     | LOC197322     | hypothetical protein LOC197322                                                    |
| 349565    | 0.40                     | PNAT3         | nicotinamide nucleotide adenyltransferase 3                                       |
| 11147     | 0.39                     | HHLA3         | HERV-H LTR-associating 3                                                          |
| 10694     | 0.39                     | KIAA0002      | chaperonin containing TCP1, subunit 8 (theta)                                     |
| 91647     | 0.39                     | MGC29736      | ATP synthase mitochondrial F1 complex assembly factor 2                           |
| 10905     | 0.38                     | MAN1B         | mannosidase, alpha, class 1A, member 2                                            |
| 26519     | 0.37                     | TIMM10        | translocase of inner mitochondrial membrane 10 homolog (yeast)                    |

|        |      |              |                                                                                      |
|--------|------|--------------|--------------------------------------------------------------------------------------|
| 8904   | 0.37 | MGC1142      | copine I                                                                             |
| 55556  | 0.37 | TYMSAS       | enolase superfamily member 1                                                         |
| 10320  | 0.37 | ZNFN1A1      | zinc finger protein, subfamily 1A, 1 (Ikaros)                                        |
| 93100  | 0.37 | PP3856       | nicotinate phosphoribosyltransferase domain containing 1                             |
| 80221  | 0.37 | FLJ20920     | hypothetical protein FLJ20920                                                        |
| 8878   | 0.37 | ZIP3         | sequestosome 1                                                                       |
| 55871  | 0.36 | CBWD1        | COBW domain containing 1                                                             |
| 84676  | 0.35 | TRIM63       | tripartite motif-containing 63                                                       |
| 10412  | 0.35 | YR-29        | TGF beta-inducible nuclear protein 1                                                 |
| 10233  | 0.35 | LRRC23       | leucine rich repeat containing 23                                                    |
| 64858  | 0.35 | SNM1B        | DNA cross-link repair 1B (PSO2 homolog, <i>S. cerevisiae</i> )                       |
| 9172   | 0.34 | TTNAP        | myomesin (M-protein) 2, 165kDa                                                       |
| 3123   | 0.34 | HLA-DRB1     | major histocompatibility complex, class II, DR beta 1                                |
| 11116  | 0.34 | FOP          | FGFR1 oncogene partner                                                               |
| 389362 | 0.34 | RP11-506K6.3 | hypothetical LOC389362                                                               |
| 6434   | 0.33 | TRA2B        | splicing factor, arginine/serine-rich 10 (transformer 2 homolog, <i>Drosophila</i> ) |
| 54465  | 0.33 | FLJ22647     | ETAA16                                                                               |
| 130502 | 0.33 | LOC130502    | similar to CG14894-PA                                                                |
| 147138 | 0.33 | TMC8         | transmembrane channel-like 8                                                         |
| 1965   | 0.33 | EIF2S1       | eukaryotic translation initiation factor 2, subunit 1 alpha, 35kDa                   |
| 10267  | 0.32 | RAMP1        | receptor (calcitonin) activity modifying protein 1                                   |
| 220    | 0.32 | RALDH3       | aldehyde dehydrogenase 1 family, member A3                                           |
| 54535  | 0.32 | SBP          | coiled-coil alpha-helical rod protein 1                                              |
| 51101  | 0.32 | CGI-62       | chromosome 8 open reading frame 70                                                   |
| 127428 | 0.32 | RP4-758J24.3 | chromosome 1 open reading frame 83                                                   |
| 81889  | 0.31 | YISKL        | fumarylacetoacetate hydrolase domain containing 1                                    |
| 1497   | 0.31 | PQLC4        | cystinosis, nephropathic                                                             |
| 3652   | 0.31 | IPP          | intracisternal A particle-promoted polypeptide                                       |
| 55278  | 0.31 | QRSL1        | glutaminyl-tRNA synthase (glutamine-hydrolyzing)-like 1                              |
| 93349  | 0.31 | MGC132667    | hypothetical protein BC004921                                                        |
| 51122  | 0.31 | MGC57611     | COMM domain containing 2                                                             |
| 145173 | 0.31 | Gal-T        | beta 1,3-galactosyltransferase-like                                                  |
| 80315  | 0.31 | KIAA1673     | cytoplasmic polyadenylation element binding protein 4                                |
| 51097  | 0.30 | SCCPDH       | saccharopine dehydrogenase (putative)                                                |
| 22900  | 0.30 | TUCAN        | caspase recruitment domain family, member 8                                          |
| 51144  | 0.30 | KAR          | hydroxysteroid (17-beta) dehydrogenase 12                                            |
| 55588  | 0.30 | MED29        | intersex-like ( <i>Drosophila</i> )                                                  |
| 1479   | 0.30 | MGC75122     | cleavage stimulation factor, 3' pre-RNA, subunit 3, 77kDa                            |
| 80007  | 0.30 | FLJ13490     | chromosome 10 open reading frame 88                                                  |
| 10438  | 0.30 | SUNCOR       | nuclear DNA-binding protein                                                          |
| 5411   | 0.29 | SDK3         | pinin, desmosome associated protein                                                  |
