# Supplementary material for: Robust Prediction of Expression Differences among Human Individuals Using Only Genotype Information
Source: PubMed Central journal article supplement (PMC3610805; doi:10.1371/journal.pgen.1003396), 2013-03-28
Supplement: pgen.1003396.s015.pdf [file pgen.1003396.s015.pdf]

**Table S11. The list of the 100 top-predicted genes of the KNN model in the Intra-Pop cross-validation scheme**

| Entrez ID | Mean Test R <sup>2</sup> | Gene Symbol   | Gene Description                                                                  |
|-----------|--------------------------|---------------|-----------------------------------------------------------------------------------|
| 91612     | 0.81                     | My015         | churchill domain containing 1                                                     |
| 94101     | 0.73                     | ORMDL1        | ORM1-like 1 ( <i>S. cerevisiae</i> )                                              |
| 6231      | 0.69                     | RPS26         | ribosomal protein S26                                                             |
| 93035     | 0.66                     | PKHDL1        | polycystic kidney and hepatic disease 1 (autosomal recessive)-like 1              |
| 7367      | 0.65                     | UGT2B17       | UDP glucuronosyltransferase 2 family, polypeptide B17                             |
| 158160    | 0.63                     | MGC88684      | hydroxysteroid (17-beta) dehydrogenase 7 pseudogene 2                             |
| 3663      | 0.62                     | IRF5          | interferon regulatory factor 5                                                    |
| 3123      | 0.57                     | HLA-DRB1      | major histocompatibility complex, class II, DR beta 1                             |
| 84288     | 0.55                     | RP11-290P14.1 | EF-hand calcium binding domain 2                                                  |
| 9045      | 0.55                     | RPL14         | ribosomal protein L14                                                             |
| 7536      | 0.51                     | ZNF162        | splicing factor 1                                                                 |
| 84833     | 0.50                     | USMG5         | upregulated during skeletal muscle growth 5 homolog (mouse)                       |
| 143570    | 0.49                     | XRRA1         | X-ray radiation resistance associated 1                                           |
| 155368    | 0.46                     | WBSCR27       | Williams Beuren syndrome chromosome region 27                                     |
| 282991    | 0.46                     | RP11-316M21.4 | biogenesis of lysosome-related organelles complex-1, subunit 2                    |
| 7311      | 0.43                     | UBA52         | ubiquitin A-52 residue ribosomal protein fusion product 1                         |
| 133383    | 0.42                     | MGC33648      | hypothetical protein MGC33648                                                     |
| 829       | 0.41                     | CAZ1          | capping protein (actin filament) muscle Z-line, alpha 1                           |
| 84545     | 0.41                     | MRPL43        | mitochondrial ribosomal protein L43                                               |
| 84641     | 0.41                     | MGC117350     | hippocampus abundant transcript-like 1                                            |
| 3105      | 0.38                     | HLA-A         | major histocompatibility complex, class I, A                                      |
| 54879     | 0.38                     | STLR          | suppression of tumorigenicity 7 like                                              |
| 858       | 0.38                     | MGC12294      | caveolin 2                                                                        |
| 10494     | 0.37                     | YSK1          | serine/threonine kinase 25 (STE20 homolog, yeast)                                 |
| 1965      | 0.37                     | EIF2S1        | eukaryotic translation initiation factor 2, subunit 1 alpha, 35kDa                |
| 4725      | 0.37                     | NDUFS5        | NADH dehydrogenase (ubiquinone) Fe-S protein 5, 15kDa (NADH-coenzyme Q reductase) |
| 55556     | 0.37                     | TYMSAS        | enolase superfamily member 1                                                      |
| 3127      | 0.36                     | HLA-DRB5      | major histocompatibility complex, class II, DR beta 5                             |
| 5190      | 0.36                     | PXAAA1        | peroxisomal biogenesis factor 6                                                   |
| 162394    | 0.35                     | SLFN5         | schlafen family member 5                                                          |
| 219927    | 0.35                     | MRPL21        | mitochondrial ribosomal protein L21                                               |
| 439921    | 0.35                     | TMAP1         | matrix-remodelling associated 7                                                   |
| 6199      | 0.35                     | STK14B        | ribosomal protein S6 kinase, 70kDa, polypeptide 2                                 |
| 84680     | 0.35                     | PHACS         | 1-aminocyclopropane-1-carboxylate synthase                                        |
| 10233     | 0.31                     | LRRC23        | leucine rich repeat containing 23                                                 |
| 55755     | 0.31                     | MCPH3         | CDK5 regulatory subunit associated protein 2                                      |
| 348094    | 0.30                     | MGC120307     | ankyrin repeat and death domain containing 1A                                     |
| 9419      | 0.30                     | HSPC139       | postsynaptic protein CRIPT                                                        |
| 51101     | 0.29                     | CGI-62        | chromosome 8 open reading frame 70                                                |
| 84314     | 0.29                     | TMEM107       | transmembrane protein 107                                                         |
| 51074     | 0.28                     | MMRP19        | APAF1 interacting protein                                                         |
| 64847     | 0.28                     | Tisp78        | spermatogenesis associated 20                                                     |
| 115024    | 0.27                     | NT5C3L        | 5'-nucleotidase, cytosolic III-like                                               |
| 255403    | 0.26                     | ZNF718        | zinc finger protein 718                                                           |
| 261726    | 0.26                     | TIPRL         | TIP41, TOR signalling pathway regulator-like ( <i>S. cerevisiae</i> )             |
| 2635      | 0.26                     | GBP3          | guanylate binding protein 3                                                       |
| 349565    | 0.26                     | PNAT3         | nicotinamide nucleotide adenylyltransferase 3                                     |
| 389362    | 0.26                     | RP11-506K6.3  | hypothetical LOC389362                                                            |
| 87769     | 0.26                     | RP11-151A6.2  | hypothetical protein BC004360                                                     |
| 93100     | 0.26                     | PP3856        | nicotinate phosphoribosyltransferase domain containing 1                          |
| 23593     | 0.25                     | SOUL          | heme binding protein 2                                                            |
| 26519     | 0.25                     | TIMM10        | translocase of inner mitochondrial membrane 10 homolog (yeast)                    |
| 10438     | 0.24                     | SUNCOR        | nuclear DNA-binding protein                                                       |
| 318       | 0.24                     | NUDT2         | nudix (nucleoside diphosphate linked moiety X)-type motif 2                       |
| 3652      | 0.24                     | IPP           | intracisternal A particle-promoted polypeptide                                    |
| 55871     | 0.24                     | CBWD1         | COBW domain containing 1                                                          |
| 81889     | 0.24                     | YISKL         | fumarylacetoacetate hydrolase domain containing 1                                 |
| 11118     | 0.23                     | BTN3A2        | butyrophilin, subfamily 3, member A2                                              |
| 131076    | 0.23                     | FLJ33273      | coiled-coil domain containing 58                                                  |
| 25895     | 0.23                     | FAM119B       | family with sequence similarity 119, member B                                     |
| 55228     | 0.23                     | FLJ10781      | hypothetical protein FLJ10781                                                     |
| 84930     | 0.23                     | THC2          | microtubule associated serine/threonine kinase-like                               |
| 27068     | 0.22                     | SID6-306      | pyrophosphatase (inorganic) 2                                                     |
| 64858     | 0.22                     | SNM1B         | DNA cross-link repair 1B (PSO2 homolog, <i>S. cerevisiae</i> )                    |
| 152815    | 0.21                     | THAP6         | THAP domain containing 6                                                          |

|        |      |           |                                                                                |
|--------|------|-----------|--------------------------------------------------------------------------------|
| 3117   | 0.21 | HLA-DQA   | major histocompatibility complex, class II, DQ alpha 1                         |
| 400566 | 0.21 | LOC400566 | hypothetical gene supported by AK128660                                        |
| 51144  | 0.21 | KAR       | hydroxysteroid (17-beta) dehydrogenase 12                                      |
| 54014  | 0.21 | WDR9      | bromodomain and WD repeat domain containing 1                                  |
| 6284   | 0.21 | S100A13   | S100 calcium binding protein A13                                               |
| 90273  | 0.21 | R29124_1  | carcinoembryonic antigen-related cell adhesion molecule 21                     |
| 10781  | 0.20 | ZNF266    | zinc finger protein 266                                                        |
| 126272 | 0.20 | FLJ38944  | EID-2-like inhibitor of differentiation-3                                      |
| 25885  | 0.20 | RPO1-4    | polymerase (RNA) I polypeptide A, 194kDa                                       |
| 2944   | 0.20 | MU        | glutathione S-transferase M1                                                   |
| 4552   | 0.20 | MTRR      | 5-methyltetrahydrofolate-homocysteine methyltransferase reductase              |
| 51097  | 0.20 | SCCPDH    | saccharopine dehydrogenase (putative)                                          |
| 5434   | 0.20 | XAP4      | polymerase (RNA) II (DNA directed) polypeptide E, 25kDa                        |
| 6217   | 0.20 | RPS16     | ribosomal protein S16                                                          |
| 8904   | 0.20 | MGC1142   | copine I                                                                       |
| 10455  | 0.19 | PECI      | peroxisomal D3,D2-enoyl-CoA isomerase                                          |
| 145173 | 0.19 | Gal-T     | beta 1,3-galactosyltransferase-like                                            |
| 1512   | 0.19 | minichain | cathepsin H                                                                    |
| 3700   | 0.19 | PK120     | inter-alpha (globulin) inhibitor H4 (plasma Kallikrein-sensitive glycoprotein) |
| 6168   | 0.19 | RPL37A    | ribosomal protein L37a                                                         |
| 7390   | 0.19 | UROS      | uroporphyrinogen III synthase (congenital erythropoietic porphyria)            |
| 92106  | 0.19 | OXNAD1    | oxidoreductase NAD-binding domain containing 1                                 |
| 146279 | 0.18 | FLJ32871  | hypothetical protein FLJ32871                                                  |
| 151963 | 0.18 | C3orf59   | chromosome 3 open reading frame 59                                             |
| 22927  | 0.18 | SERP1L    | hyaluronan binding protein 4                                                   |
| 283232 | 0.18 | TMEM80    | transmembrane protein 80                                                       |
| 4605   | 0.18 | MYBL2     | v-myb myeloblastosis viral oncogene homolog (avian)-like 2                     |
| 51657  | 0.18 | STYXL1    | serine/threonine/tyrosine interacting-like 1                                   |
| 57602  | 0.18 | USP36     | ubiquitin specific peptidase 36                                                |
| 63897  | 0.18 | FLJ22087  | amplified in breast cancer 1                                                   |
| 79741  | 0.18 | FLJ13031  | chromosome 10 open reading frame 68                                            |
| 84328  | 0.18 | MGC15436  | leucine zipper and CTNNBIP1 domain containing                                  |
| 84617  | 0.18 | TUBB6     | tubulin, beta 6                                                                |
| 953    | 0.18 | NTPDase-1 | ectonucleoside triphosphate diphosphohydrolase 1                               |
| 127255 | 0.17 | MGC22773  | leucine rich repeat containing 44                                              |
