# Supplementary material for: Robust Prediction of Expression Differences among Human Individuals Using Only Genotype Information
Source: PubMed Central journal article supplement (PMC3610805; doi:10.1371/journal.pgen.1003396), 2013-03-28
Supplement: pgen.1003396.s016.pdf [file pgen.1003396.s016.pdf]

**Table S12. The list of the 100 top-predicted genes of the Elastic-Net model in the Intra-Pop cross-validation scheme**

| Entrez ID | Mean Test R <sup>2</sup> | Gene Symbol   | Gene Description                                                                  |
|-----------|--------------------------|---------------|-----------------------------------------------------------------------------------|
| 91612     | 0.82                     | My015         | churchill domain containing 1                                                     |
| 94101     | 0.80                     | ORMDL1        | ORM1-like 1 ( <i>S. cerevisiae</i> )                                              |
| 3123      | 0.79                     | HLA-DRB1      | major histocompatibility complex, class II, DR beta 1                             |
| 93035     | 0.76                     | PKHDL1        | polycystic kidney and hepatic disease 1 (autosomal recessive)-like 1              |
| 6231      | 0.75                     | RPS26         | ribosomal protein S26                                                             |
| 9045      | 0.74                     | RPL14         | ribosomal protein L14                                                             |
| 400566    | 0.73                     | LOC400566     | hypothetical gene supported by AK128660                                           |
| 5434      | 0.71                     | XAP4          | polymerase (RNA) II (DNA directed) polypeptide E, 25kDa                           |
| 158160    | 0.70                     | MGC88684      | hydroxysteroid (17-beta) dehydrogenase 7 pseudogene 2                             |
| 3105      | 0.69                     | HLA-A         | major histocompatibility complex, class I, A                                      |
| 9317      | 0.67                     | RPR-1         | phosphotriesterase related                                                        |
| 7311      | 0.64                     | UBA52         | ubiquitin A-52 residue ribosomal protein fusion product 1                         |
| 439921    | 0.63                     | TMAP1         | matrix-remodelling associated 7                                                   |
| 7536      | 0.62                     | ZNF162        | splicing factor 1                                                                 |
| 84833     | 0.62                     | USMG5         | upregulated during skeletal muscle growth 5 homolog (mouse)                       |
| 3663      | 0.61                     | IRF5          | interferon regulatory factor 5                                                    |
| 27004     | 0.59                     | TNG2          | T-cell leukemia/lymphoma 6                                                        |
| 55228     | 0.58                     | FLJ10781      | hypothetical protein FLJ10781                                                     |
| 3127      | 0.56                     | HLA-DRB5      | major histocompatibility complex, class II, DR beta 5                             |
| 64847     | 0.56                     | Tisp78        | spermatogenesis associated 20                                                     |
| 3117      | 0.55                     | HLA-DQA       | major histocompatibility complex, class II, DQ alpha 1                            |
| 84288     | 0.55                     | RP11-290P14.1 | EF-hand calcium binding domain 2                                                  |
| 10494     | 0.54                     | YSK1          | serine/threonine kinase 25 (STE20 homolog, yeast)                                 |
| 84680     | 0.53                     | PHACS         | 1-aminocyclopropane-1-carboxylate synthase                                        |
| 143570    | 0.52                     | XRRA1         | X-ray radiation resistance associated 1                                           |
| 54879     | 0.51                     | STLR          | suppression of tumorigenicity 7 like                                              |
| 93100     | 0.50                     | PP3856        | nicotinate phosphoribosyltransferase domain containing 1                          |
| 25902     | 0.49                     | MTHFD1L       | methylenetetrahydrofolate dehydrogenase (NADP+ dependent) 1-like                  |
| 829       | 0.49                     | CAZ1          | capping protein (actin filament) muscle Z-line, alpha 1                           |
| 131076    | 0.48                     | FLJ33273      | coiled-coil domain containing 58                                                  |
| 2944      | 0.48                     | MU            | glutathione S-transferase M1                                                      |
| 9623      | 0.47                     | TML1          | T-cell leukemia/lymphoma 1B                                                       |
| 90273     | 0.47                     | R29124_1      | carcinoembryonic antigen-related cell adhesion molecule 21                        |
| 10438     | 0.47                     | SUNCOR        | nuclear DNA-binding protein                                                       |
| 133383    | 0.46                     | MGC33648      | hypothetical protein MGC33648                                                     |
| 348094    | 0.46                     | MGC120307     | ankyrin repeat and death domain containing 1A                                     |
| 79618     | 0.45                     | PBHF          | homeobox containing 1                                                             |
| 155368    | 0.45                     | WBSCR27       | Williams Beuren syndrome chromosome region 27                                     |
| 87769     | 0.45                     | RP11-151A6.2  | hypothetical protein BC004360                                                     |
| 5190      | 0.45                     | PXAAA1        | peroxisomal biogenesis factor 6                                                   |
| 7367      | 0.44                     | UGT2B17       | UDP glucuronosyltransferase 2 family, polypeptide B17                             |
| 55556     | 0.44                     | TYMSAS        | enolase superfamily member 1                                                      |
| 162394    | 0.44                     | SLFN5         | schlafen family member 5                                                          |
| 127255    | 0.43                     | MGC22773      | leucine rich repeat containing 44                                                 |
| 349565    | 0.43                     | PNAT3         | nicotinamide nucleotide adenyltransferase 3                                       |
| 84545     | 0.43                     | MRPL43        | mitochondrial ribosomal protein L43                                               |
| 1965      | 0.43                     | EIF2S1        | eukaryotic translation initiation factor 2, subunit 1 alpha, 35kDa                |
| 6199      | 0.43                     | STK14B        | ribosomal protein S6 kinase, 70kDa, polypeptide 2                                 |
| 55871     | 0.41                     | CBWD1         | COBW domain containing 1                                                          |
| 84641     | 0.41                     | MGC117350     | hippocampus abundant transcript-like 1                                            |
| 219927    | 0.41                     | MRPL21        | mitochondrial ribosomal protein L21                                               |
| 6168      | 0.40                     | RPL37A        | ribosomal protein L37a                                                            |
| 261726    | 0.40                     | TIPRL         | TIP41, TOR signalling pathway regulator-like ( <i>S. cerevisiae</i> )             |
| 10077     | 0.39                     | TSSC6         | tetraspanin 32                                                                    |
| 4725      | 0.39                     | NDUFS5        | NADH dehydrogenase (ubiquinone) Fe-S protein 5, 15kDa (NADH-coenzyme Q reductase) |
| 152815    | 0.39                     | THAP6         | THAP domain containing 6                                                          |
| 55755     | 0.39                     | MCPH3         | CDK5 regulatory subunit associated protein 2                                      |
| 26519     | 0.38                     | TIMM10        | translocase of inner mitochondrial membrane 10 homolog (yeast)                    |
| 51074     | 0.38                     | MMRP19        | APAF1 interacting protein                                                         |
| 9419      | 0.38                     | HSPC139       | postsynaptic protein CRIPT                                                        |
| 2635      | 0.38                     | GBP3          | guanylate binding protein 3                                                       |
| 282991    | 0.37                     | RP11-316M21.4 | biogenesis of lysosome-related organelles complex-1, subunit 2                    |
| 151963    | 0.37                     | C3orf59       | chromosome 3 open reading frame 59                                                |
| 118980    | 0.36                     | SFXN2         | sideroflexin 2                                                                    |

|        |      |               |                                                                                         |
|--------|------|---------------|-----------------------------------------------------------------------------------------|
| 10352  | 0.36 | WARS2         | tryptophanyl tRNA synthetase 2 (mitochondrial)                                          |
| 10233  | 0.35 | LRRC23        | leucine rich repeat containing 23                                                       |
| 113386 | 0.34 | LOC113386     | similar to envelope protein                                                             |
| 80817  | 0.34 | PS1TP3        | KIAA1712                                                                                |
| 64858  | 0.33 | SNM1B         | DNA cross-link repair 1B (PSO2 homolog, <i>S. cerevisiae</i> )                          |
| 8034   | 0.33 | SLC25A16      | solute carrier family 25 (mitochondrial carrier; Graves disease autoantigen), member 16 |
| 4552   | 0.33 | MTRR          | 5-methyltetrahydrofolate-homocysteine methyltransferase reductase                       |
| 1838   | 0.33 | MGC57126      | dystrobrevin, beta                                                                      |
| 255403 | 0.33 | ZNF718        | zinc finger protein 718                                                                 |
| 8904   | 0.33 | MGC1142       | copine I                                                                                |
| 8312   | 0.33 | MGC52315      | axin 1                                                                                  |
| 115024 | 0.32 | NT5C3L        | 5'-nucleotidase, cytosolic III-like                                                     |
| 1635   | 0.32 | MGC111062     | dCMP deaminase                                                                          |
| 23008  | 0.32 | KIAA0265      | KIAA0265 protein                                                                        |
| 27068  | 0.32 | SID6-306      | pyrophosphatase (inorganic) 2                                                           |
| 80162  | 0.32 | MGC129859     | ATH1, acid trehalase-like 1 (yeast)                                                     |
| 389362 | 0.32 | RP11-506K6.3  | hypothetical LOC389362                                                                  |
| 196446 | 0.32 | MGC126869     | chromosome 12 open reading frame 28                                                     |
| 84328  | 0.32 | MGC15436      | leucine zipper and CTNNBIP1 domain containing                                           |
| 29928  | 0.31 | TIMM22        | translocase of inner mitochondrial membrane 22 homolog (yeast)                          |
| 7773   | 0.31 | ZNF230        | zinc finger protein 230                                                                 |
| 80221  | 0.30 | FLJ20920      | hypothetical protein FLJ20920                                                           |
| 10953  | 0.30 | TOMM34        | translocase of outer mitochondrial membrane 34                                          |
| 116028 | 0.30 | MGC24665      | hypothetical protein MGC24665                                                           |
| 25895  | 0.30 | FAM119B       | family with sequence similarity 119, member B                                           |
| 80008  | 0.30 | TMEM156       | transmembrane protein 156                                                               |
| 5411   | 0.30 | SDK3          | pinin, desmosome associated protein                                                     |
| 80315  | 0.30 | KIAA1673      | cytoplasmic polyadenylation element binding protein 4                                   |
| 51097  | 0.30 | SCCPDH        | saccharopine dehydrogenase (putative)                                                   |
| 116540 | 0.30 | MRPL53        | mitochondrial ribosomal protein L53                                                     |
| 3652   | 0.30 | IPP           | intracisternal A particle-promoted polypeptide                                          |
| 79762  | 0.30 | RP11-322F10.4 | chromosome 1 open reading frame 115                                                     |
| 25885  | 0.29 | RPO1-4        | polymerase (RNA) I polypeptide A, 194kDa                                                |
| 54014  | 0.29 | WDR9          | bromodomain and WD repeat domain containing 1                                           |
| 6217   | 0.29 | RPS16         | ribosomal protein S16                                                                   |
| 11118  | 0.29 | BTN3A2        | butyrophilin, subfamily 3, member A2                                                    |
