# Supplementary material for: Robust Prediction of Expression Differences among Human Individuals Using Only Genotype Information
Source: PubMed Central journal article supplement (PMC3610805; doi:10.1371/journal.pgen.1003396), 2013-03-28
Supplement: pgen.1003396.s017.pdf [file pgen.1003396.s017.pdf]

**Table S13. The list of the 100 top-predicted genes of the Single-SNP model in the Intra-Pop cross-validation scheme**

| Entrez ID | Mean Test R <sup>2</sup> | Gene Symbol   | Gene Description                                                     |
|-----------|--------------------------|---------------|----------------------------------------------------------------------|
| 7311      | 0.84                     | UBA52         | ubiquitin A-52 residue ribosomal protein fusion product 1            |
| 91612     | 0.82                     | My015         | churchill domain containing 1                                        |
| 6231      | 0.77                     | RPS26         | ribosomal protein S26                                                |
| 9045      | 0.77                     | RPL14         | ribosomal protein L14                                                |
| 27004     | 0.75                     | TNG2          | T-cell leukemia/lymphoma 6                                           |
| 84833     | 0.75                     | USMG5         | upregulated during skeletal muscle growth 5 homolog (mouse)          |
| 3117      | 0.74                     | HLA-DQA       | major histocompatibility complex, class II, DQ alpha 1               |
| 94101     | 0.73                     | ORMDL1        | ORM1-like 1 ( <i>S. cerevisiae</i> )                                 |
| 5434      | 0.70                     | XAP4          | polymerase (RNA) II (DNA directed) polypeptide E, 25kDa              |
| 84680     | 0.70                     | PHACS         | 1-aminocyclopropane-1-carboxylate synthase                           |
| 84641     | 0.69                     | MGC117350     | hippocampus abundant transcript-like 1                               |
| 9317      | 0.69                     | RPR-1         | phosphotriesterase related                                           |
| 282991    | 0.68                     | RP11-316M21.4 | biogenesis of lysosome-related organelles complex-1, subunit 2       |
| 143570    | 0.65                     | XRRA1         | X-ray radiation resistance associated 1                              |
| 158160    | 0.65                     | MGC88684      | hydroxysteroid (17-beta) dehydrogenase 7 pseudogene 2                |
| 64847     | 0.64                     | Tisp78        | spermatogenesis associated 20                                        |
| 79618     | 0.64                     | PBHNF         | homeobox containing 1                                                |
| 93035     | 0.64                     | PKHDL1        | polycystic kidney and hepatic disease 1 (autosomal recessive)-like 1 |
| 3663      | 0.63                     | IRF5          | interferon regulatory factor 5                                       |
| 10494     | 0.62                     | YSK1          | serine/threonine kinase 25 (STE20 homolog, yeast)                    |
| 83543     | 0.62                     | MGC29466      | chromosome 9 open reading frame 58                                   |
| 348094    | 0.60                     | MGC120307     | ankyrin repeat and death domain containing 1A                        |
| 858       | 0.59                     | MGC12294      | caveolin 2                                                           |
| 25902     | 0.59                     | MTHFD1L       | methylenetetrahydrofolate dehydrogenase (NADP+ dependent) 1-like     |
| 6168      | 0.58                     | RPL37A        | ribosomal protein L37a                                               |
| 55755     | 0.55                     | MCPH3         | CDK5 regulatory subunit associated protein 2                         |
| 5190      | 0.55                     | PXAAA1        | peroxisomal biogenesis factor 6                                      |
| 4731      | 0.54                     | NDUFV3        | NADH dehydrogenase (ubiquinone) flavoprotein 3, 10kDa                |
| 3127      | 0.54                     | HLA-DRB5      | major histocompatibility complex, class II, DR beta 5                |
| 93100     | 0.54                     | PP3856        | nicotinate phosphoribosyltransferase domain containing 1             |
| 90273     | 0.53                     | R29124_1      | carcinoembryonic antigen-related cell adhesion molecule 21           |
| 9623      | 0.53                     | TML1          | T-cell leukemia/lymphoma 1B                                          |
| 155368    | 0.52                     | WBSCR27       | Williams Beuren syndrome chromosome region 27                        |
| 439921    | 0.51                     | TMAP1         | matrix-remodelling associated 7                                      |
| 23593     | 0.50                     | SOUL          | heme binding protein 2                                               |
| 349565    | 0.50                     | PNAT3         | nicotinamide nucleotide adenylyltransferase 3                        |
| 84288     | 0.49                     | RP11-290P14.1 | EF-hand calcium binding domain 2                                     |
| 829       | 0.49                     | CAZ1          | capping protein (actin filament) muscle Z-line, alpha 1              |
| 1965      | 0.48                     | EIF2S1        | eukaryotic translation initiation factor 2, subunit 1 alpha, 35kDa   |
| 87769     | 0.48                     | RP11-151A6.2  | hypothetical protein BC004360                                        |
| 7536      | 0.48                     | ZNF162        | splicing factor 1                                                    |
| 133383    | 0.47                     | MGC33648      | hypothetical protein MGC33648                                        |
| 3105      | 0.47                     | HLA-A         | major histocompatibility complex, class I, A                         |
| 54879     | 0.47                     | STLR          | suppression of tumorigenicity 7 like                                 |
| 3118      | 0.47                     | HLA-DXA       | major histocompatibility complex, class II, DQ alpha 2               |
| 219927    | 0.47                     | MRPL21        | mitochondrial ribosomal protein L21                                  |
| 400566    | 0.47                     | LOC400566     | hypothetical gene supported by AK128660                              |
| 131076    | 0.47                     | FLJ33273      | coiled-coil domain containing 58                                     |
| 6199      | 0.46                     | STK14B        | ribosomal protein S6 kinase, 70kDa, polypeptide 2                    |
| 162394    | 0.46                     | SLFN5         | schlafen family member 5                                             |
| 196446    | 0.46                     | MGC126869     | chromosome 12 open reading frame 28                                  |
| 84545     | 0.45                     | MRPL43        | mitochondrial ribosomal protein L43                                  |
| 255403    | 0.44                     | ZNF718        | zinc finger protein 718                                              |
| 10438     | 0.44                     | SUNCOR        | nuclear DNA-binding protein                                          |
| 197322    | 0.44                     | LOC197322     | hypothetical protein LOC197322                                       |
| 10905     | 0.44                     | MAN1B         | mannosidase, alpha, class 1A, member 2                               |
| 11147     | 0.43                     | HHLA3         | HERV-H LTR-associating 3                                             |
| 27068     | 0.43                     | SID6-306      | pyrophosphatase (inorganic) 2                                        |
| 283726    | 0.43                     | DKFZp666G057  | hypothetical protein DKFZp666G057                                    |
| 84221     | 0.43                     | MGC99490      | chromosome 21 open reading frame 56                                  |
| 80221     | 0.42                     | FLJ20920      | hypothetical protein FLJ20920                                        |
| 80315     | 0.42                     | KIAA1673      | cytoplasmic polyadenylation element binding protein 4                |
| 127255    | 0.42                     | MGC22773      | leucine rich repeat containing 44                                    |
| 91687     | 0.42                     | RP3-383J4.1   | centromere protein L                                                 |
| 8312      | 0.42                     | MGC52315      | axin 1                                                               |

|        |      |           |                                                                                   |
|--------|------|-----------|-----------------------------------------------------------------------------------|
| 8904   | 0.42 | MGC1142   | copine I                                                                          |
| 55228  | 0.40 | FLJ10781  | hypothetical protein FLJ10781                                                     |
| 55871  | 0.40 | CBWD1     | COBW domain containing 1                                                          |
| 118980 | 0.40 | SFXN2     | sideroflexin 2                                                                    |
| 7773   | 0.40 | ZNF230    | zinc finger protein 230                                                           |
| 51101  | 0.40 | CGI-62    | chromosome 8 open reading frame 70                                                |
| 3123   | 0.40 | HLA-DRB1  | major histocompatibility complex, class II, DR beta 1                             |
| 26519  | 0.39 | TIMM10    | translocase of inner mitochondrial membrane 10 homolog (yeast)                    |
| 25895  | 0.39 | FAM119B   | family with sequence similarity 119, member B                                     |
| 11118  | 0.38 | BTN3A2    | butyrophilin, subfamily 3, member A2                                              |
| 115024 | 0.38 | NT5C3L    | 5'-nucleotidase, cytosolic III-like                                               |
| 25885  | 0.37 | RPO1-4    | polymerase (RNA) I polypeptide A, 194kDa                                          |
| 7639   | 0.37 | ZNF85     | zinc finger protein 85                                                            |
| 8878   | 0.37 | ZIP3      | sequestosome 1                                                                    |
| 9882   | 0.37 | TBC1D4    | TBC1 domain family, member 4                                                      |
| 116028 | 0.37 | MGC24665  | hypothetical protein MGC24665                                                     |
| 4725   | 0.36 | NDUFS5    | NADH dehydrogenase (ubiquinone) Fe-S protein 5, 15kDa (NADH-coenzyme Q reductase) |
| 1635   | 0.36 | MGC111062 | dCMP deaminase                                                                    |
| 80008  | 0.36 | TMEM156   | transmembrane protein 156                                                         |
| 10233  | 0.36 | LRRC23    | leucine rich repeat containing 23                                                 |
| 5411   | 0.36 | SDK3      | pinin, desmosome associated protein                                               |
| 318    | 0.35 | NUDT2     | nudix (nucleoside diphosphate linked moiety X)-type motif 2                       |
| 9501   | 0.34 | RPH3AL    | rabphilin 3A-like (without C2 domains)                                            |
| 151246 | 0.34 | TRIPIN    | shugoshin-like 2 (S. pombe)                                                       |
| 261726 | 0.34 | TIPRL     | TIP41, TOR signalling pathway regulator-like (S. cerevisiae)                      |
| 51122  | 0.34 | MGC57611  | COMM domain containing 2                                                          |
| 10953  | 0.34 | TOMM34    | translocase of outer mitochondrial membrane 34                                    |
| 6217   | 0.34 | RPS16     | ribosomal protein S16                                                             |
| 55556  | 0.34 | TYMSAS    | enolase superfamily member 1                                                      |
| 10412  | 0.34 | YR-29     | TGF beta-inducible nuclear protein 1                                              |
| 63897  | 0.34 | FLJ22087  | amplified in breast cancer 1                                                      |
| 7367   | 0.34 | UGT2B17   | UDP glucuronosyltransferase 2 family, polypeptide B17                             |
| 55278  | 0.34 | QRSL1     | glutaminyl-tRNA synthase (glutamine-hydrolyzing)-like 1                           |
| 81544  | 0.34 | PP1665    | glycerophosphodiester phosphodiesterase domain containing 5                       |
| 132001 | 0.33 | MGC16471  | chromosome 3 open reading frame 31                                                |
