# Supplementary material for: Robust Prediction of Expression Differences among Human Individuals Using Only Genotype Information
Source: PubMed Central journal article supplement (PMC3610805; doi:10.1371/journal.pgen.1003396), 2013-03-28
Supplement: pgen.1003396.s018.pdf [file pgen.1003396.s018.pdf]

**Table S14.** for each cross-validation scheme and model, shown is the percentage of genes (with test  $R^2 \geq 0.05$ ) where the model had the best predictive power

|           | KNN | Elastic-Net | Combined | Single-SNP |
|-----------|-----|-------------|----------|------------|
| Cross-pop | 9%  | 39%         | 16%      | 34%        |
| Mixed-pop | 3%  | 37%         | 18%      | 41%        |
| Intra-pop | 3%  | 47%         | 22%      | 26%        |
