# Supplementary material for: Robust Prediction of Expression Differences among Human Individuals Using Only Genotype Information
Source: PubMed Central journal article supplement (PMC3610805; doi:10.1371/journal.pgen.1003396), 2013-03-28
Supplement: pgen.1003396.s019.pdf [file pgen.1003396.s019.pdf]

**Table S15. Full list of all genomic features compiled for this paper**

| #  | Genomic Feature  | Type   | Description / source                                                                                                                                                        |
|----|------------------|--------|-----------------------------------------------------------------------------------------------------------------------------------------------------------------------------|
| 1  | Promoter         | Binary | SNP Location in gene                                                                                                                                                        |
| 2  | 5UTR             | Binary | SNP Location in gene                                                                                                                                                        |
| 3  | CDS              | Binary | SNP Location in gene                                                                                                                                                        |
| 4  | Intron           | Binary | SNP Location in gene                                                                                                                                                        |
| 5  | 3UTR             | Binary | SNP Location in gene                                                                                                                                                        |
| 6  | GC-50-Low        | Binary | GC% < 0.3 in the flanking 50bp of the SNP                                                                                                                                   |
| 7  | GC-50-MedLow     | Binary | 0.3 < GC% < 0.5 in the flanking 50bp of the SNP                                                                                                                             |
| 8  | GC-50-MedHigh    | Binary | 0.5 < GC% < 0.7 in the flanking 50bp of the SNP                                                                                                                             |
| 9  | GC-50-High       | Binary | GC% > 0.7 in the flanking 50bp of the SNP                                                                                                                                   |
| 10 | GC-100-Low       | Binary | GC% < 0.3 in the flanking 100bp of the SNP                                                                                                                                  |
| 11 | GC-100-MedLow    | Binary | 0.3 < GC% < 0.5 in the flanking 100bp of the SNP                                                                                                                            |
| 12 | GC-100-MedHigh   | Binary | 0.5 < GC% < 0.7 in the flanking 100bp of the SNP                                                                                                                            |
| 13 | GC-100-High      | Binary | GC% > 0.7 in the flanking 100bp of the SNP                                                                                                                                  |
| 14 | Histone-H3K4me1  | Cont.  | Different Histone markers, taken from <a href="http://dir.nhlbi.nih.gov/papers/lmi/epigenomes/hgtcell.aspx">http://dir.nhlbi.nih.gov/papers/lmi/epigenomes/hgtcell.aspx</a> |
| 15 | Histone-H3K4me2  | Cont.  | Different Histone markers, taken from <a href="http://dir.nhlbi.nih.gov/papers/lmi/epigenomes/hgtcell.aspx">http://dir.nhlbi.nih.gov/papers/lmi/epigenomes/hgtcell.aspx</a> |
| 16 | Histone-H3K4me3  | Cont.  | Different Histone markers, taken from <a href="http://dir.nhlbi.nih.gov/papers/lmi/epigenomes/hgtcell.aspx">http://dir.nhlbi.nih.gov/papers/lmi/epigenomes/hgtcell.aspx</a> |
| 17 | Histone-H3K9me1  | Cont.  | Different Histone markers, taken from <a href="http://dir.nhlbi.nih.gov/papers/lmi/epigenomes/hgtcell.aspx">http://dir.nhlbi.nih.gov/papers/lmi/epigenomes/hgtcell.aspx</a> |
| 18 | Histone-H3K9me2  | Cont.  | Different Histone markers, taken from <a href="http://dir.nhlbi.nih.gov/papers/lmi/epigenomes/hgtcell.aspx">http://dir.nhlbi.nih.gov/papers/lmi/epigenomes/hgtcell.aspx</a> |
| 19 | Histone-H3K9me3  | Cont.  | Different Histone markers, taken from <a href="http://dir.nhlbi.nih.gov/papers/lmi/epigenomes/hgtcell.aspx">http://dir.nhlbi.nih.gov/papers/lmi/epigenomes/hgtcell.aspx</a> |
| 20 | Histone-H3K27me1 | Cont.  | Different Histone markers, taken from <a href="http://dir.nhlbi.nih.gov/papers/lmi/epigenomes/hgtcell.aspx">http://dir.nhlbi.nih.gov/papers/lmi/epigenomes/hgtcell.aspx</a> |
| 21 | Histone-H3K27me2 | Cont.  | Different Histone markers, taken from <a href="http://dir.nhlbi.nih.gov/papers/lmi/epigenomes/hgtcell.aspx">http://dir.nhlbi.nih.gov/papers/lmi/epigenomes/hgtcell.aspx</a> |
| 22 | Histone-H3K27me3 | Cont.  | Different Histone markers, taken from <a href="http://dir.nhlbi.nih.gov/papers/lmi/epigenomes/hgtcell.aspx">http://dir.nhlbi.nih.gov/papers/lmi/epigenomes/hgtcell.aspx</a> |
| 23 | Histone-H3K36me1 | Cont.  | Different Histone markers, taken from <a href="http://dir.nhlbi.nih.gov/papers/lmi/epigenomes/hgtcell.aspx">http://dir.nhlbi.nih.gov/papers/lmi/epigenomes/hgtcell.aspx</a> |
| 24 | Histone-H3K36me3 | Cont.  | Different Histone markers, taken from <a href="http://dir.nhlbi.nih.gov/papers/lmi/epigenomes/hgtcell.aspx">http://dir.nhlbi.nih.gov/papers/lmi/epigenomes/hgtcell.aspx</a> |
| 25 | Histone-H3K79me1 | Cont.  | Different Histone markers, taken from <a href="http://dir.nhlbi.nih.gov/papers/lmi/epigenomes/hgtcell.aspx">http://dir.nhlbi.nih.gov/papers/lmi/epigenomes/hgtcell.aspx</a> |
| 26 | Histone-H3K79me2 | Cont.  | Different Histone markers, taken from <a href="http://dir.nhlbi.nih.gov/papers/lmi/epigenomes/hgtcell.aspx">http://dir.nhlbi.nih.gov/papers/lmi/epigenomes/hgtcell.aspx</a> |

|    |                         |       |                                                                                                                                                                             |
|----|-------------------------|-------|-----------------------------------------------------------------------------------------------------------------------------------------------------------------------------|
| 27 | Histone-H3K79me3        | Cont. | Different Histone markers, taken from <a href="http://dir.nhlbi.nih.gov/papers/lmi/epigenomes/hgtcell.aspx">http://dir.nhlbi.nih.gov/papers/lmi/epigenomes/hgtcell.aspx</a> |
| 28 | Histone-H3R2me1         | Cont. | Different Histone markers, taken from <a href="http://dir.nhlbi.nih.gov/papers/lmi/epigenomes/hgtcell.aspx">http://dir.nhlbi.nih.gov/papers/lmi/epigenomes/hgtcell.aspx</a> |
| 29 | Histone-H3R2me2         | Cont. | Different Histone markers, taken from <a href="http://dir.nhlbi.nih.gov/papers/lmi/epigenomes/hgtcell.aspx">http://dir.nhlbi.nih.gov/papers/lmi/epigenomes/hgtcell.aspx</a> |
| 30 | Histone-H4K20me1        | Cont. | Different Histone markers, taken from <a href="http://dir.nhlbi.nih.gov/papers/lmi/epigenomes/hgtcell.aspx">http://dir.nhlbi.nih.gov/papers/lmi/epigenomes/hgtcell.aspx</a> |
| 31 | Histone-H4K20me3        | Cont. | Different Histone markers, taken from <a href="http://dir.nhlbi.nih.gov/papers/lmi/epigenomes/hgtcell.aspx">http://dir.nhlbi.nih.gov/papers/lmi/epigenomes/hgtcell.aspx</a> |
| 32 | Histone-H4R3me2         | Cont. | Different Histone markers, taken from <a href="http://dir.nhlbi.nih.gov/papers/lmi/epigenomes/hgtcell.aspx">http://dir.nhlbi.nih.gov/papers/lmi/epigenomes/hgtcell.aspx</a> |
| 33 | Histone-H2BK5me1        | Cont. | Different Histone markers, taken from <a href="http://dir.nhlbi.nih.gov/papers/lmi/epigenomes/hgtcell.aspx">http://dir.nhlbi.nih.gov/papers/lmi/epigenomes/hgtcell.aspx</a> |
| 34 | Histone-H2AZ            | Cont. | Different Histone markers, taken from <a href="http://dir.nhlbi.nih.gov/papers/lmi/epigenomes/hgtcell.aspx">http://dir.nhlbi.nih.gov/papers/lmi/epigenomes/hgtcell.aspx</a> |
| 35 | PolII                   | Cont. | Different Histone markers, taken from <a href="http://dir.nhlbi.nih.gov/papers/lmi/epigenomes/hgtcell.aspx">http://dir.nhlbi.nih.gov/papers/lmi/epigenomes/hgtcell.aspx</a> |
| 36 | CTCF                    | Cont. | Different Histone markers, taken from <a href="http://dir.nhlbi.nih.gov/papers/lmi/epigenomes/hgtcell.aspx">http://dir.nhlbi.nih.gov/papers/lmi/epigenomes/hgtcell.aspx</a> |
| 37 | HistoneAcetyl-H2AK5ac   | Cont. | Different Histone markers, taken from <a href="http://dir.nhlbi.nih.gov/papers/lmi/epigenomes/hgtcell.aspx">http://dir.nhlbi.nih.gov/papers/lmi/epigenomes/hgtcell.aspx</a> |
| 38 | HistoneAcetyl-H2AK9ac   | Cont. | Different Histone markers, taken from <a href="http://dir.nhlbi.nih.gov/papers/lmi/epigenomes/hgtcell.aspx">http://dir.nhlbi.nih.gov/papers/lmi/epigenomes/hgtcell.aspx</a> |
| 39 | HistoneAcetyl-H2BK120ac | Cont. | Different Histone markers, taken from <a href="http://dir.nhlbi.nih.gov/papers/lmi/epigenomes/hgtcell.aspx">http://dir.nhlbi.nih.gov/papers/lmi/epigenomes/hgtcell.aspx</a> |
| 40 | HistoneAcetyl-H2BK12ac  | Cont. | Different Histone markers, taken from <a href="http://dir.nhlbi.nih.gov/papers/lmi/epigenomes/hgtcell.aspx">http://dir.nhlbi.nih.gov/papers/lmi/epigenomes/hgtcell.aspx</a> |
| 41 | HistoneAcetyl-H2BK20ac  | Cont. | Different Histone markers, taken from <a href="http://dir.nhlbi.nih.gov/papers/lmi/epigenomes/hgtcell.aspx">http://dir.nhlbi.nih.gov/papers/lmi/epigenomes/hgtcell.aspx</a> |
| 42 | HistoneAcetyl-H2BK5ac   | Cont. | Different Histone markers, taken from <a href="http://dir.nhlbi.nih.gov/papers/lmi/epigenomes/hgtcell.aspx">http://dir.nhlbi.nih.gov/papers/lmi/epigenomes/hgtcell.aspx</a> |
| 43 | HistoneAcetyl-H3K14ac   | Cont. | Different Histone markers, taken from <a href="http://dir.nhlbi.nih.gov/papers/lmi/epigenomes/hgtcell.aspx">http://dir.nhlbi.nih.gov/papers/lmi/epigenomes/hgtcell.aspx</a> |
| 44 | HistoneAcetyl-H3K18ac   | Cont. | Different Histone markers, taken from <a href="http://dir.nhlbi.nih.gov/papers/lmi/epigenomes/hgtcell.aspx">http://dir.nhlbi.nih.gov/papers/lmi/epigenomes/hgtcell.aspx</a> |
| 45 | HistoneAcetyl-H3K23ac   | Cont. | Different Histone markers, taken from <a href="http://dir.nhlbi.nih.gov/papers/lmi/epigenomes/hgtcell.aspx">http://dir.nhlbi.nih.gov/papers/lmi/epigenomes/hgtcell.aspx</a> |

|    |                       |        |                                                                                                                                                                             |
|----|-----------------------|--------|-----------------------------------------------------------------------------------------------------------------------------------------------------------------------------|
| 46 | HistoneAcetyl-H3K27ac | Cont.  | Different Histone markers, taken from <a href="http://dir.nhlbi.nih.gov/papers/lmi/epigenomes/hgtcell.aspx">http://dir.nhlbi.nih.gov/papers/lmi/epigenomes/hgtcell.aspx</a> |
| 47 | HistoneAcetyl-H3K36ac | Cont.  | Different Histone markers, taken from <a href="http://dir.nhlbi.nih.gov/papers/lmi/epigenomes/hgtcell.aspx">http://dir.nhlbi.nih.gov/papers/lmi/epigenomes/hgtcell.aspx</a> |
| 48 | HistoneAcetyl-H3K4ac  | Cont.  | Different Histone markers, taken from <a href="http://dir.nhlbi.nih.gov/papers/lmi/epigenomes/hgtcell.aspx">http://dir.nhlbi.nih.gov/papers/lmi/epigenomes/hgtcell.aspx</a> |
| 49 | HistoneAcetyl-H3K9ac  | Cont.  | Different Histone markers, taken from <a href="http://dir.nhlbi.nih.gov/papers/lmi/epigenomes/hgtcell.aspx">http://dir.nhlbi.nih.gov/papers/lmi/epigenomes/hgtcell.aspx</a> |
| 50 | HistoneAcetyl-H4K12ac | Cont.  | Different Histone markers, taken from <a href="http://dir.nhlbi.nih.gov/papers/lmi/epigenomes/hgtcell.aspx">http://dir.nhlbi.nih.gov/papers/lmi/epigenomes/hgtcell.aspx</a> |
| 51 | HistoneAcetyl-H4K16ac | Cont.  | Different Histone markers, taken from <a href="http://dir.nhlbi.nih.gov/papers/lmi/epigenomes/hgtcell.aspx">http://dir.nhlbi.nih.gov/papers/lmi/epigenomes/hgtcell.aspx</a> |
| 52 | HistoneAcetyl-H4K5ac  | Cont.  | Different Histone markers, taken from <a href="http://dir.nhlbi.nih.gov/papers/lmi/epigenomes/hgtcell.aspx">http://dir.nhlbi.nih.gov/papers/lmi/epigenomes/hgtcell.aspx</a> |
| 53 | HistoneAcetyl-H4K8ac  | Cont.  | Different Histone markers, taken from <a href="http://dir.nhlbi.nih.gov/papers/lmi/epigenomes/hgtcell.aspx">http://dir.nhlbi.nih.gov/papers/lmi/epigenomes/hgtcell.aspx</a> |
| 54 | HistoneAcetyl-H4K91ac | Cont.  | Different Histone markers, taken from <a href="http://dir.nhlbi.nih.gov/papers/lmi/epigenomes/hgtcell.aspx">http://dir.nhlbi.nih.gov/papers/lmi/epigenomes/hgtcell.aspx</a> |
| 55 | 1_Active_Promoter     | Binary | Encode track from the paper by Ernst and Kellis: doi:10.1038/nbt.1662                                                                                                       |
| 56 | 2_Weak_Promoter       | Binary | Encode track from the paper by Ernst and Kellis: doi:10.1038/nbt.1662                                                                                                       |
| 57 | 3_Poised_Promoter     | Binary | Encode track from the paper by Ernst and Kellis: doi:10.1038/nbt.1662                                                                                                       |
| 58 | 4_Strong_Enhancer     | Binary | Encode track from the paper by Ernst and Kellis: doi:10.1038/nbt.1662                                                                                                       |
| 59 | 5_Strong_Enhancer     | Binary | Encode track from the paper by Ernst and Kellis: doi:10.1038/nbt.1662                                                                                                       |
| 60 | 6_Weak_Enhancer       | Binary | Encode track from the paper by Ernst and Kellis: doi:10.1038/nbt.1662                                                                                                       |
| 61 | 7_Weak_Enhancer       | Binary | Encode track from the paper by Ernst and Kellis: doi:10.1038/nbt.1662                                                                                                       |
| 62 | 8_Insulator           | Binary | Encode track from the paper by Ernst and Kellis: doi:10.1038/nbt.1662                                                                                                       |
| 63 | 9_Txn_Transition      | Binary | Encode track from the paper by Ernst and Kellis: doi:10.1038/nbt.1662                                                                                                       |
| 64 | 10_Txn_Elongation     | Binary | Encode track from the paper by Ernst and Kellis: doi:10.1038/nbt.1662                                                                                                       |
| 65 | 11_Weak_Txn           | Binary | Encode track from the paper by Ernst and Kellis: doi:10.1038/nbt.1662                                                                                                       |
| 66 | 12_Repressed          | Binary | Encode track from the paper by Ernst and Kellis: doi:10.1038/nbt.1662                                                                                                       |
| 67 | 13_Heterochrom_lo     | Binary | Encode track from the paper by Ernst and Kellis: doi:10.1038/nbt.1662                                                                                                       |
| 68 | 14_Repetitive_CNV     | Binary | Encode track from the paper by Ernst and Kellis: doi:10.1038/nbt.1662                                                                                                       |

|    |                       |        |                                                                                                                                                                                                    |
|----|-----------------------|--------|----------------------------------------------------------------------------------------------------------------------------------------------------------------------------------------------------|
| 69 | 15_Repetitive_CNV     | Binary | Encode track from the paper by Ernst and Kellis:<br>doi:10.1038/nbt.1662                                                                                                                           |
| 70 | CONS-1-Low            | Binary | UCSC conservation track, conservation < 0.1                                                                                                                                                        |
| 71 | CONS-1-MedLow         | Binary | UCSC conservation track, 0.1 < conservation < 0.3                                                                                                                                                  |
| 72 | CONS-1-MedHigh        | Binary | UCSC conservation track, 0.3 < conservation < 0.6                                                                                                                                                  |
| 73 | CONS-1-High           | Binary | UCSC conservation track, conservation > 0.6                                                                                                                                                        |
| 74 | CONS-10-Low           | Binary | UCSC conservation track, average conservation in 10 flanking bp < 0.1                                                                                                                              |
| 75 | CONS-10-MedLow        | Binary | UCSC conservation track, 0.1 < average conservation in 10 flanking bp < 0.3                                                                                                                        |
| 76 | CONS-10-MedHigh       | Binary | UCSC conservation track, 0.3 < average conservation in 10 flanking bp < 0.6                                                                                                                        |
| 77 | CONS-10-High          | Binary | UCSC conservation track, average conservation in 10 flanking bp > 0.6                                                                                                                              |
| 78 | MIRNA_TS              | Binary | SNP located in microRNA target site by TargetScan prediction ( <a href="http://www.targetscan.org/">http://www.targetscan.org/</a> )                                                               |
| 79 | MIRNA_PITA            | Binary | SNP located in microRNA target site by PITA prediction ( <a href="http://genie.weizmann.ac.il/pubs/mir07/mir07_prediction.html">http://genie.weizmann.ac.il/pubs/mir07/mir07_prediction.html</a> ) |
| 80 | CPG                   | Binary | UCSC CpG Island track                                                                                                                                                                              |
| 81 | CHROMATIN_AVG         | Cont.  | Average nucleosome occupancy predicted using model ( <a href="http://genie.weizmann.ac.il/software/nucleo_prediction.html">http://genie.weizmann.ac.il/software/nucleo_prediction.html</a> )       |
| 82 | REG_POTEN             | Cont.  | UCSC regulatory potential track                                                                                                                                                                    |
| 83 | ENCODE_TFBS_CLUSTERED | Binary | Encode track for Clustered transcription factor binding sites                                                                                                                                      |
| 84 | TFBS_CENT             | Binary | transcription factor binding sites from <a href="http://centipede.uchicago.edu/">http://centipede.uchicago.edu/</a>                                                                                |
| 85 | MethylSeq_Gm12878     | Binary | Methylation status, taken from ENCODE, Hudson Alpha GM12878/91/92                                                                                                                                  |
| 86 | MethylSeq_Gm12891     | Binary | Methylation status, taken from ENCODE, Hudson Alpha GM12878/91/92                                                                                                                                  |
| 87 | MethylSeq_Gm12892     | Binary | Methylation status, taken from ENCODE, Hudson Alpha GM12878/91/92                                                                                                                                  |
| 88 | ChipSeq_Ctcf          | Cont.  | Broad ChipSeq, taken from ENCODE                                                                                                                                                                   |
| 89 | ChipSeq_H3k27ac       | Cont.  | Broad ChipSeq, taken from ENCODE                                                                                                                                                                   |
| 90 | ChipSeq_H3k27me3      | Cont.  | Broad ChipSeq, taken from ENCODE                                                                                                                                                                   |
| 91 | ChipSeq_H3k36me3      | Cont.  | Broad ChipSeq, taken from ENCODE                                                                                                                                                                   |
| 92 | ChipSeq_H3k4me1       | Cont.  | Broad ChipSeq, taken from ENCODE                                                                                                                                                                   |
| 93 | ChipSeq_H3k4me2       | Cont.  | Broad ChipSeq, taken from ENCODE                                                                                                                                                                   |
| 94 | ChipSeq_H3k4me3       | Cont.  | Broad ChipSeq, taken from ENCODE                                                                                                                                                                   |
| 95 | ChipSeq_H3k9ac        | Cont.  | Broad ChipSeq, taken from ENCODE                                                                                                                                                                   |
| 96 | ChipSeq_H4k20me1      | Cont.  | Broad ChipSeq, taken from ENCODE                                                                                                                                                                   |
| 97 | TSS_UP_0_1000         | Binary | TSS/TES distance bin, gene coordinates taken from UCSC                                                                                                                                             |
| 98 | TES_UP_0_1000         | Binary | TSS/TES distance bin, gene coordinates taken from UCSC                                                                                                                                             |
| 99 | TSS_DOWN_0_1000       | Binary | TSS/TES distance bin, gene coordinates taken from UCSC                                                                                                                                             |

|     |                       |        |                                                        |
|-----|-----------------------|--------|--------------------------------------------------------|
| 100 | TES_DOWN_0_1000       | Binary | TSS/TES distance bin, gene coordinates taken from UCSC |
| 101 | TSS_UP_1000_5000      | Binary | TSS/TES distance bin, gene coordinates taken from UCSC |
| 102 | TES_UP_1000_5000      | Binary | TSS/TES distance bin, gene coordinates taken from UCSC |
| 103 | TSS_DOWN_1000_5000    | Binary | TSS/TES distance bin, gene coordinates taken from UCSC |
| 104 | TES_DOWN_1000_5000    | Binary | TSS/TES distance bin, gene coordinates taken from UCSC |
| 105 | TSS_UP_5000_15000     | Binary | TSS/TES distance bin, gene coordinates taken from UCSC |
| 106 | TES_UP_5000_15000     | Binary | TSS/TES distance bin, gene coordinates taken from UCSC |
| 107 | TSS_DOWN_5000_15000   | Binary | TSS/TES distance bin, gene coordinates taken from UCSC |
| 108 | TES_DOWN_5000_15000   | Binary | TSS/TES distance bin, gene coordinates taken from UCSC |
| 109 | TSS_UP_15000_50000    | Binary | TSS/TES distance bin, gene coordinates taken from UCSC |
| 110 | TES_UP_15000_50000    | Binary | TSS/TES distance bin, gene coordinates taken from UCSC |
| 111 | TSS_DOWN_15000_50000  | Binary | TSS/TES distance bin, gene coordinates taken from UCSC |
| 112 | TES_DOWN_15000_50000  | Binary | TSS/TES distance bin, gene coordinates taken from UCSC |
| 113 | TSS_UP_50000_100000   | Binary | TSS/TES distance bin, gene coordinates taken from UCSC |
| 114 | TES_UP_50000_100000   | Binary | TSS/TES distance bin, gene coordinates taken from UCSC |
| 115 | TSS_DOWN_50000_100000 | Binary | TSS/TES distance bin, gene coordinates taken from UCSC |
| 116 | TES_DOWN_50000_100000 | Binary | TSS/TES distance bin, gene coordinates taken from UCSC |
| 117 | Entropy               | Cont.  | SNP entropy across all individuals (see methods)       |
