# Supplementary material for: Robust Prediction of Expression Differences among Human Individuals Using Only Genotype Information
Source: PubMed Central journal article supplement (PMC3610805; doi:10.1371/journal.pgen.1003396), 2013-03-28
Supplement: pgen.1003396.s020.pdf [file pgen.1003396.s020.pdf]

**Table S16. Enriched and depleted genomic features in multi-SNP models**

| Enriched genomic features | Description / source                                                                                                                                                                                  |
|---------------------------|-------------------------------------------------------------------------------------------------------------------------------------------------------------------------------------------------------|
| CDS                       | SNP Location in gene                                                                                                                                                                                  |
| 3UTR                      | SNP Location in gene                                                                                                                                                                                  |
| GC-50-High                | GC% > 0.7 in the flanking 50bp of the SNP                                                                                                                                                             |
| GC-100-High               | GC% > 0.7 in the flanking 100bp of the SNP                                                                                                                                                            |
| HistoneAcetyl-H2AK5ac     | Different Histone markers, taken from<br><a href="http://dir.nhlbi.nih.gov/papers/lmi/epigenomes/hgtcell.aspx">http://dir.nhlbi.nih.gov/papers/lmi/epigenomes/hgtcell.aspx</a>                        |
| HistoneAcetyl-H2BK5ac     |                                                                                                                                                                                                       |
| HistoneAcetyl-H3K27ac     |                                                                                                                                                                                                       |
| HistoneAcetyl-H3K4ac      |                                                                                                                                                                                                       |
| HistoneAcetyl-H4K91ac     |                                                                                                                                                                                                       |
| Active_Promoter           | Encode track from the paper by Ernst and Kellis:<br>doi:10.1038/nbt.1662                                                                                                                              |
| Weak_Promoter             |                                                                                                                                                                                                       |
| Strong_Enhancer           |                                                                                                                                                                                                       |
| Txn_Transition            |                                                                                                                                                                                                       |
| MIRNA_PITA                | SNP located in microRNA target site by PITA prediction<br>( <a href="http://genie.weizmann.ac.il/pubs/mir07/mir07_prediction.html">http://genie.weizmann.ac.il/pubs/mir07/mir07_prediction.html</a> ) |
| CPG                       | UCSC CpG Island track                                                                                                                                                                                 |
| TFBS_CENT                 | transcription factor binding sites from<br><a href="http://centipede.uchicago.edu/">http://centipede.uchicago.edu/</a>                                                                                |
| MethylSeq_Gm12878         | Methylation status, taken from ENCODE, Hudson Alpha<br>GM12878/91/92                                                                                                                                  |
| TSS_UP_0_1000             | TSS/TES distance bin, gene coordinates taken from<br>UCSC                                                                                                                                             |
| TES_UP_0_1000             |                                                                                                                                                                                                       |
| TSS_DOWN_0_1000           |                                                                                                                                                                                                       |
| TSS_UP_1000_5000          |                                                                                                                                                                                                       |
| TES_UP_1000_5000          |                                                                                                                                                                                                       |
| TSS_DOWN_1000_5000        |                                                                                                                                                                                                       |
| TES_DOWN_1000_5000        |                                                                                                                                                                                                       |
| TSS_UP_5000_15000         |                                                                                                                                                                                                       |
| TES_UP_5000_15000         |                                                                                                                                                                                                       |
| TSS_DOWN_5000_15000       |                                                                                                                                                                                                       |
| TES_DOWN_5000_15000       |                                                                                                                                                                                                       |
| Depleted genomic features |                                                                                                                                                                                                       |
| GC-50-MedLow              | 0.3 < GC% < 0.5 in the flanking 50bp of the SNP                                                                                                                                                       |
| GC-100-MedLow             | 0.3 < GC% < 0.5 in the flanking 100bp of the SNP                                                                                                                                                      |
| Heterochrom               | Encode track from the paper by Ernst and Kellis:<br>doi:10.1038/nbt.1662                                                                                                                              |

**shown are SNP genomic features that were significantly enriched or depleted in both the extended-KNN algorithm and the regularized linear model. Enrichment/depletion of a genomic feature was defined as a feature with hypergeometric test p-value  $P < 0.01$  in all cross-validations**
