# Supplementary material for: Robust Prediction of Expression Differences among Human Individuals Using Only Genotype Information
Source: PubMed Central journal article supplement (PMC3610805; doi:10.1371/journal.pgen.1003396), 2013-03-28
Supplement: pgen.1003396.s021.pdf [file pgen.1003396.s021.pdf]

| <b>GO category</b>                                                                        | <b>P-value</b> | <b>#genes</b> |
|-------------------------------------------------------------------------------------------|----------------|---------------|
| cytoplasmic part                                                                          | 1.22E-07       | 143           |
| mitochondrion                                                                             | 4.04E-06       | 51            |
| MHC class II protein complex                                                              | 5.60E-06       | 6             |
| ribosome                                                                                  | 6.98E-06       | 20            |
| MHC protein complex                                                                       | 1.32E-05       | 8             |
| MHC class II receptor activity                                                            | 1.50E-05       | 5             |
| structural constituent of ribosome                                                        | 2.87E-05       | 18            |
| antigen processing and presentation of peptide or polysaccharide antigen via MHC class II | 3.20E-05       | 6             |
| cytoplasm                                                                                 | 3.89E-05       | 178           |
| intracellular part                                                                        | 6.93E-05       | 291           |
| intracellular organelle part                                                              | 0.00013581     | 108           |
| organelle part                                                                            | 0.00013581     | 108           |
| antigen processing and presentation                                                       | 0.00014958     | 9             |
| ribonucleoprotein complex                                                                 | 0.00015573     | 29            |
| cellular polysaccharide catabolic process                                                 | 0.00017971     | 5             |
| polysaccharide catabolic process                                                          | 0.00017971     | 5             |
| organelle membrane                                                                        | 0.00038388     | 39            |
| RNA polymerase complex                                                                    | 0.00073221     | 6             |
